# Supplementary material
Source: PubMed Central journal article supplement (PMC5021149)
Supplement: IMB-25-460-s001.pdf [file IMB-25-460-s001.pdf]

## Supporting information

### Figure Legends

**Figure S1. RACE products and reconstructed su(Hw) insulator transcripts.** A) RACE amplification products for *su(Hw)*, *mod(mdg4)* and *CP190*. All genes had a single transcript for the 5' and 3' RACE reactions, with the exception of *mod(mdg4)* 3' RACE, which had nine groups with varying molecular weights. All groups were cloned and sequenced. Each of the groups gave the following *Anopheles stephensi mod(mdg4)* isoform: group 1: isoform C; group 2: isoform H; group 3: isoform O; group 4: isoforms A, D, L; group 5: isoform G; group 6: isoforms K, N; group 7: isoforms I, M; group 8: isoform E, J; group 9: F, P. B) RACE and walking primer sequencing data from *su(Hw)*, *mod(mdg4)* and *CP190* from *An. stephensi*. The 5' and 3' UTR sequences are highlighted in yellow and bold letters indicate exon-exon junctions.

**Figure S2. Alignment of Su(Hw) protein complex.** Alignment of predicted amino acid sequences encoding Su(Hw), Mod(mdg4) and CP190 from *An. stephensi* and *D. melanogaster*. The red color indicates highly conserved residues and the blue indicated less conservation as determined by alignment using Cobalt (<http://www.st-va.ncbi.nlm.nih.gov/tools/cobalt>).

**Figure S3. Predicted protein domains encoded by the gene orthologues of the su(Hw)-insulator complex in mosquitoes.** Protein sequences were aligned using the ClustalW algorithm. Identical and highly conserved residues are highlighted in gray. The zinc-coordinating

residues are indicated in red. Abbreviations: STEPHE, *Anopheles stephensi*; GAMBIAE, *Anopheles gambiae*; AEDES, *Aedes aegypti*; CULEX, *Culex quinquefasciatus*.

## Tables

| <b>Table S1. Oligonucleotide primers.</b> |                              |                                    |                    |
|-------------------------------------------|------------------------------|------------------------------------|--------------------|
| <b>Primer Name</b>                        | <b>Sequence (5' → 3')</b>    | <b>Application</b>                 | <b>Reference</b>   |
| S7-F                                      | GGTGCACCTGGATAAGAACCA        | S7 controls                        | Brown et al., 2014 |
| S7-R                                      | CGGCCAGTCAGCTTCTTGAC         | S7 controls                        | Brown et al., 2014 |
| Su(hw) F14                                | CCAATTACGGGGTTGTTCGC         | Genomic and RT-PCR                 | This study         |
| Su(hw) R14                                | ACGCCGGGCACTTGTATTT          | Genomic and RT-PCR                 | This study         |
| Su(hw) F15                                | TGATACTGGACATGAAGCGCA        | Genomic and RT-PCR                 | This study         |
| Su(hw) R15                                | ATGCTCCGCAGCGCA              | Genomic and RT-PCR                 | This study         |
| Su(hw) F16                                | CCGTGCGATCTGTGCC             | Genomic and RT-PCR                 | This study         |
| Su(hw) R16                                | TCCATCGTGGTGATCTGATAGATG     | Genomic and RT-PCR                 | This study         |
| Su(hw) F17                                | ACCGAGAAGGAAAAGATGGAAAAG     | Genomic and RT-PCR                 | This study         |
| Su(hw) R17                                | CCCATCAGCATCTGCAGCA          | Genomic and RT-PCR                 | This study         |
| Su(hw) F18                                | CCGATCTCCTGAGCGACG           | RT-PCR/3' RACE PCR                 | This study         |
| Su(hw) R18                                | CCTTACGCGTTTATAAGGTCTTTAGAAG | Genomic and RT-PCR                 | This study         |
| Su(hw) F22                                | GCGATATCGCCCAAGCGAGAAACG     | Probe synthesis                    | This study         |
| Su(hw) R22                                | TAGCGGCCGCCTACTTGTCTTCAGCA   | Probe synthesis                    | This study         |
| Su(hw) R25                                | GAGTCGCCAAAAGTACTAGA         | 5' RACE PCR                        | This study         |
| Su(hw) qPCR F1                            | AGGACGGTCGGTTGATACTG         | qRT-PCR                            | This study         |
| Su(hw) qPCR R1                            | CGGGCACTTGTATTTGTGTG         | qRT-PCR                            | This study         |
| Mod F12                                   | GACTGAGCGGCGGTAAGCG          | Genomic, RT-PCR                    | This study         |
| Mod R12                                   | TTTGTACGATTGAATGCGGTTACG     | Genomic, RT-PCR/5' RACE PCR        | This study         |
| Mod F13                                   | CTACCCGCCTTTATCAGTACCGC      | Genomic, RT-PCR/probe creation     | This study         |
| Mod R13                                   | AGCTCAATGTATTCCGGCTCAATC     | Genomic, RT-PCR                    | This study         |
| Mod F14                                   | ACGAAAATGTCCATCAGTGCTAG      | Genomic, RT-PCR/3' RACE PCR        | This study         |
| Mod R14-1                                 | TCCACGAATCCAGATACGCCAG       | Genomic, RT-PCR/probe creation     | This study         |
| Mod R14-2                                 | AAGACCGCCAAGGCTGGAG          | Genomic, RT-PCR                    | This study         |
| Mod F15                                   | GAAGTGGCAGGGAACAATC          | Genomic, RT-PCR/3' nested RACE PCR | This study         |
| Mod qPCR F1                               | AAGCAACTCCCTGCACAAGT         | qRT-PCR                            | This study         |
| Mod qPCR R1                               | CTGTTCCGTCTCAGCATCAA         | qRT-PCR                            | This study         |
| CP190 14F                                 | CATCCAATTTCCGGCAACG          | Genomic, RT-PCR                    | This study         |
| CP190 14R                                 | CAGCACC GGTTGCTTCACAA        | Genomic, RT-PCR                    | This study         |
| CP190 15F                                 | GACATGAACATGACCGTGCT         | Genomic, RT-PCR/probe synthesis    | This study         |
| CP190 15R                                 | GCCGGGTGATTTGATTTCCT         | Genomic, RT-PCR/probe synthesis    | This study         |
| CP190 16F                                 | GATTCGCCCCGACTACGTGGA        | Genomic, RT-PCR                    | This study         |
| CP190 16R                                 | ATGGTTGTAGAACGCTTTGTAGCT     | Genomic, RT-PCR                    | This study         |
| CP190 17F                                 | GATTCGCCCCGACTACGTGGA        | Genomic, RT-PCR                    | This study         |
| CP190 17R                                 | ATGCCGGACGCCACATT            | Genomic, RT-PCR                    | This study         |
| CP190 18F                                 | CTGTCCAACATTACGCTGCC         | Genomic, RT-PCR                    | This study         |
| CP190 18R                                 | TCCGGCTTGTCGGACG             | Genomic, RT-PCR                    | This study         |
| CP190 19F                                 | CATAACGATAGCCAAAAGTCCG       | Genomic, RT-PCR                    | This study         |
| CP190 19R                                 | GTATCCTCCGACCAATCGCC         | Genomic, RT-PCR                    | This study         |
| CP190 20F                                 | ACGATTCCGGAAGATCGGCAG        | Genomic, RT-PCR                    | This study         |

|                                                                                                                                                                         |                            |                 |            |
|-------------------------------------------------------------------------------------------------------------------------------------------------------------------------|----------------------------|-----------------|------------|
| CP190 20R                                                                                                                                                               | TTTGTCTTATCCTCTTCGTCGC     | Genomic, RT-PCR | This study |
| CP190 24R                                                                                                                                                               | ATCGGCACTATCACGTCGGC       | 5' RACE         | This study |
| CP190 26F                                                                                                                                                               | CTAACTACAACAGTCACAGAAGTGGC | 3' RACE         | This study |
| CP190 qPCR F2                                                                                                                                                           | GGACGAGCTCACAGAGGAAG       | qRT-PCR         | This study |
| CP190 qPCR R2                                                                                                                                                           | CCTTCACACCGGTCACCTTT       | qRT-PCR         | This study |
| All primers were oligomer ssDNA strands synthesized to order by Sigma Aldrich (sigmaaldrich.com). "RT-PCR" refers to the primer's usage in the primer walking strategy. |                            |                 |            |

**Table S2.** Detailed analysis of the transcript-specific sequences of the *Anopheles stephensi mod(mdg4)* transcripts.

| <i>Anopheles stephensi</i> name | <i>Anopheles gambiae</i> homology <sup>1</sup> | Intron 3-4 (bp)             | Exon 4 (bp) | Intron 4-5 (bp) | Exon 5 (bp) | Intron 5-6 (bp) | Exon 6 (bp) | 3' UTR (bp) | cds length (bp) |
|---------------------------------|------------------------------------------------|-----------------------------|-------------|-----------------|-------------|-----------------|-------------|-------------|-----------------|
| Mod A                           | None                                           | 7091                        | 88          | 33              | 141         | 95              | 200         | 138         | 1519            |
| Mod B                           | None                                           | 7903                        | 356         | -               | -           | -               | -           | 47          | 1446            |
| Mod C                           | R-A                                            | 8442                        | 406         | 252             | 22          | -               | -           | 243         | 1518            |
| Mod D                           | R-N                                            | 9558                        | 392         | -               | -           | -               | -           | 102         | 1482            |
| Mod E                           | None                                           | 13,827                      | 332         | -               | -           | -               | -           | 41          | 1422            |
| Mod F                           | None                                           | 14,897                      | 218         | -               | -           | -               | -           | 105         | 1308            |
| Mod G                           | None                                           | 15,368                      | 109         | 74              | 259         | -               | -           | 208         | 1458            |
| Mod H                           | R-K                                            | 16,415                      | 458         | -               | -           | -               | -           | 381         | 1548            |
| Mod I                           | None                                           | 18,799                      | 320         | -               | -           | -               | -           | 100         | 1410            |
| Mod J                           | R-R                                            | 19,380                      | 356         | -               | -           | -               | -           | 106         | 1446            |
| Mod K                           | R-L                                            | 22,232                      | 176         | -               | -           | -               | -           | 317         | 1266            |
| Mod L                           | None                                           | 24,598                      | 371         | -               | -           | -               | -           | 211         | 1461            |
| Mod M                           | R-T                                            | 27,919                      | 323         | -               | -           | -               | -           | 89          | 1413            |
| Mod N                           | None                                           | 28,639                      | 143         | -               | -           | -               | -           | 305         | 1233            |
| Mod O                           | R-I                                            | 35,113+ poly-N <sup>2</sup> | 461         | -               | -           | -               | -           | 231         | 1551            |
| Mod P                           | 003438-RA                                      | 44,010+ poly-N <sup>2</sup> | 287         | -               | -           | -               | -           | 95          | 1377            |

<sup>1</sup>*Anopheles gambiae* homology refers to transcript-specific regions in *An. stephensi* transcripts with a low e-value (<1e-10) hit against the *An. gambiae mod(mdg4)* transcripts.

<sup>2</sup>Poly-N refers to a poorly sequenced region of the *An. stephensi* genome that was an indeterminate length.

**Table S3.** Transcript abundance ( $\Delta\Delta Cq$ ) and statistical analyses of differences in *As-su(Hw)*, *As-mod(mdg4)* and *As-CP190* mRNA abundance in embryonic, larval, pupal and adult developmental stages, and in ovaries and midguts of adult females.

| Sample                    | Su(Hw) [p-value]       | Mod(mdg4) [p-value]    | CP190 [p-value]        |
|---------------------------|------------------------|------------------------|------------------------|
| Eggs                      | 1.80 [N/A]             | 3.79 [N/A]             | 13.07 [N/A]            |
| L4                        | 1.02 [0.980]           | 1.02 [ <b>0.0006</b> ] | 1.03 [0.070]           |
| Male pupae                | 1.29 [0.999]           | 1.63 [ <b>0.008</b> ]  | 2.41 [ <b>0.007</b> ]  |
| Female pupae              | 1.24 [0.998]           | 1.32 [ <b>0.002</b> ]  | 2.43 [ <b>0.007</b> ]  |
| Male                      | 5.54 [ <b>0.001</b> ]  | 4.60 [0.814]           | 6.68 [ <b>0.000</b> ]  |
| Female (adult, sugar fed) | 1.14 [0.993]           | 2.00 [ <b>0.042</b> ]  | 1.52 [ <b>0.036</b> ]  |
| FEM 6 hPBM                | 1.55 [1.000]           | 1.69 [ <b>0.011</b> ]  | 1.61 [ <b>0.031</b> ]  |
| FEM 24 hPBM               | 2.17 [0.999]           | 4.98 [0.371]           | 5.02 [ <b>0.000</b> ]  |
| FEM 48 hPBM               | 4.50 [ <b>0.032</b> ]  | 10.26 [ <b>0.000</b> ] | 7.75 [ <b>0.000</b> ]  |
| FEM 72 hPBM               | 5.50 [ <b>0.001</b> ]  | 10.75 [ <b>0.000</b> ] | 10.54 [ <b>0.003</b> ] |
| FEM POST-OVI              | 2.30 [0.999]           | 2.41 [0.589]           | 3.38 [0.095]           |
| Ovaries                   | 3.84 [0.543]           | 7.65 [ <b>0.0005</b> ] | 4.40 [ <b>0.015</b> ]  |
| OV 6 hPBM                 | 2.75 [0.990]           | 5.24 [0.526]           | 2.00 [0.329]           |
| OV 24 hPBM                | 2.74 [0.990]           | 7.07 [ <b>0.0032</b> ] | 4.03 [ <b>0.036</b> ]  |
| OV 48 hPBM                | 5.49 [ <b>0.028</b> ]  | 13.07 [ <b>0.000</b> ] | 12.11 [0.431]          |
| OV 72 hPBM                | 4.58 [0.179]           | 11.24 [ <b>0.000</b> ] | 11.88 [0.186]          |
| Midgut                    | 2.12 [1.000]           | 1.60 [0.093]           | 2.74 [0.189]           |
| MG 6 hPBM                 | 1.78 [1.024]           | 1.30 [ <b>0.038</b> ]  | 1.88 [0.381]           |
| MG 24 hPBM                | 7.87 [ <b>0.0001</b> ] | 2.11 [0.338]           | 5.12 [ <b>0.002</b> ]  |
| MG 48 hPBM                | 2.12 [1.000]           | 1.01 [0.125]           | 2.42 [0.297]           |
| MG 72 hPBM                | 2.04 [1.000]           | 1.88 [0.542]           | 1.91 [0.417]           |

*P* values calculated with a *t* test. *P* values  $\leq 0.05$  were considered significant (shown in bold).

Abbreviations: L4: 4<sup>th</sup> instar larvae, FEM: female, hPBM: hours post blood meal, FEM POST-OVI: females post-laid eggs, OV: ovaries, MG: midgut.

Figure S1 RACE products and reconstructed *su(Hw)* insulator transcripts.

A) RACE amplification products for *su(Hw)*, *mod(mdg4)* and *CP190*.

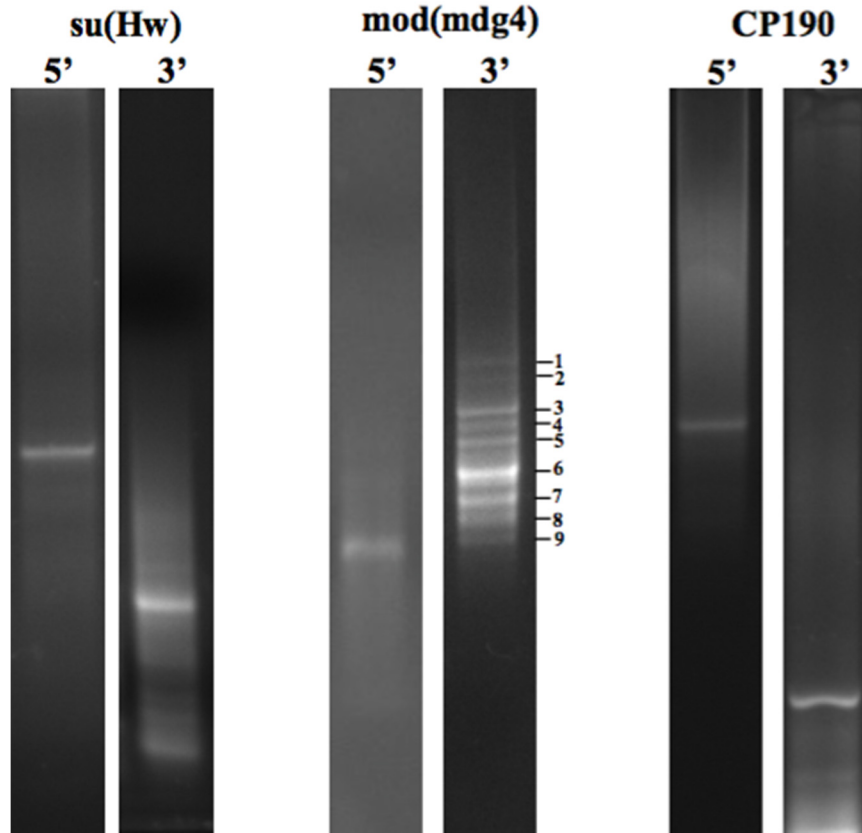

B) Reconstructed *su(Hw)* insulator transcripts.

*su(Hw)*

```

GTGTACAAGTGAATTTGATCGCAAATATCCACCAAAGATGCGCTTCGGTGGTGCCAAAGTGG
TTTGCTAGTGGTTTGCTGACCGATGGTTGTGCATCAAACATTCCTACACACAGTTCCTTCGGT
GCGTGCGATTGGTTTGGCTGTAGGCGCATATTGTGTGACCAGAACGAGCGTGCATGCTAATG
CCCGCCTTCGCGCGCGCTTCGCGCGCGCGGCCGTGTAAGACAGTAAACATCGCGTTCGTTGTT
TCAGTTGGCGTTAGCGTTGGTGCTCGTACAAAAACAGGGGAGAATCCAATTTACGGGGTTG
TTCGCGCTTGGATCAAAGCAGGCGACGTTTCTAGTTTTGGGCGATTTCCCATGATGGTAGG
CAGTCGGCGATCCGTTGTCGGTGGAGTCCGTAGCGGTGGGGTGAAGAAGGAAGAGATTTG
GTAAACGTGCAGGTGAACGGTAACGACGAGATTGACCTGGTGCCGGTCAACAAGAGCGCGG
ACTATGGGAGAGGATCGAGCGACGATCGAGACGGTGATGAGGAGGAAGAGGAGGACTACG
AAGATCTGTCCGACAATCCGGACTCGGATCCGGATCTGCTCGAGACGGAGGACGGTCCGTT
GATACTGGACATGAAGCGCAGCAAGTACTGTGGCAGGTGTAAAAAGATTTTCAAACATCA
GCGGAACAGAAAGCACACAAATACAAGTGCCCGGGCGTTGTGGATGAGGTGCAGGACGTC
ATCCTGAAGGAGCGTAAGGCGGCCAAGCATGCGAACCCGGGCGAAGAGTTCCACAAGTACT
    
```

GCAATCCGAACCCGGACAATCCGTGCTACTGCTGCGGTGAGGATGTGAGCACCGCGCACGT  
CGGCCACATCCGCTGCAAGTTCTGTCCCAAATCGTTCAAAGCGTACGAGTACATGGAGCGGC  
ACCTGAGCTCGATCCACTCGGAGTCGGACGCATTTCCGTGCTGCTACTGCAACGCCAAGTGC  
AGCACGCAGGAAATTCTGGACGAGCATCTGAAGACACACGACGAGGGGCAAACCGTACGCGT  
GTATGGCGTGCGGTAAAGATTTTACCCGCCGCTACCATCTGGACCGCCACGAAAAGCACACC  
AAGTGCGGGATCGTTCCCAAGGAGGTGGAGGTGCTACCGTGCAGGTCGTGGCAAGGAGT  
TTACGCGCATTGACAATCTGCGGGAACATTTGCGTTCGCACATGGGGCAAGGGGCACGCAA  
GCGGGATTACCAGTGTCCGTACTGCTCGAAGTCATTCTACGGCTCATCGTTGCTGAACATAC  
ACATACGCACGCACACGGGCGAGAAACCGTTTCCGTGCGATCTGTGCCCGATGTCGTTCCCG  
TCGACCGGTGCGCTGCGGAAGCATCGGCGCAAGCATAACGGGCGAACGGCCGTACCGCTGCG  
ACGAGTGTTTACGCAACGTTTGC CGCGCGTGAACGCTTAACCGGCACCGGAAAACGCACAC  
CGGCGAGAAGCCGCACGTGTGTCAAGGAGTGCGGCAAACGGTTCATCCAAGCGACACAGTCT  
CGGTCCCACATGCTCAACCACAGTGGCGACAGTGC GTTCCAGTGCAGCGAGTGCAGTGCAG  
CGTTCAATCGCAAAGCCC GGCTCACGGAGCACATCAAGTTCACGCACAAGGGAGAGCAACC  
GTTCGAGTGCAGAAAATGTTCCAAAACGTTCCCTGCGCAAGGATGATCTCGCACGCCACGAGC  
TGATCCATTTCGGACGTTAAA**CC**CTACGAATGTTTGGTGTGTAGGAAATTTTTACCACCAA  
AACGCTATCCTGTTGCACCAGCGGACGCATCTGGAGGAAAATCCGGTCCAGTGTAAGGTTTG  
CTCCGGCACCTTCAAACGGTCCGACTGTCTGATGCGGCACATGCGTACAAAACACC**GC**GAC  
TTTTTGGACAAAATTATCGACGATACCGAGAAGGAAAAGATGGAAAAGCTGACCACCACCA  
AGCGAGAAAACGGAAAAGGAAGCGGTGGTGGAGATAGACGGTGCCATCTATCAGATCACCAC  
GATGGACGATGCACCCGCGAAGGGGACCGCTTACACCGGCAACAACCAAACGGTGGAGGTG  
TTCGAGGTGGTAGAGCTCCCGGCAAGCGCTTCCGACGCGATACCAAACACACTGCCGACCA  
CCTCGGTACCGTACGAGCTGGTACCGGTTGTGGATGATACGGAAGTAATACTGGGCGACAG  
CAGTCCGGTAGAGTTTGTGCGGTAAAGCAAACACTCCAATCGACGTGGTTGTGAAGAAGGAG  
GAAGATTCGTTCAAAAAGGTAAAGTCCCCGCCAAAGCGACTGTCGTTTCAAAATCAAGCG  
AACCCGTTGCACCGAAGGTTGTTGGTAAAGCTAGCGAAGGAGAACCGTCGCGCAAGAGCGT  
TCCAAGCACTTCAAAAACAACGGCCACGATAAAACCGAAGACGGAACATGTAGTAGCTGTG  
CGTGCGAGCAATGAACCACCACAGAAAACGCCACCGAAGCTAGCGAAAGAGATTGCGCGCG  
AAAAGGAGGAACCCAGCACCAAGCTGGCAAAGAAGCCGGCTACATTACCAACCGCCCGACC  
GAAAGAGGCCAAGAGCAGGGGCGGTGGAGGAAGCGAAGCTGAAGCGCAAACGTGAACCCAA  
ACCGGCCACCCCGAAGCGAATGCGCCCGGACGAGGACAGCATTCCGATCTTCCTGAGCGAC  
GATATGCTCGAGCAAAGATTTCCGAACTGCTGCAGATGCTGATGGGGGAGGATATGTTGC  
GCAGCTTCGGTTGGCCGAACGCACCGGTCGAGGTGGTGTCTCGGGCGCGTCATCCAGGGCTGC  
GGTCATCAGCCGGCAGACTAGGAGGCCGGTGACCATACGACGCGCATGCGAGAAAACACCA  
AGATACTGTTTTCCGTACGATGGACGATGACGACATTAAGGCTTTGCTGAACAATCACACG  
GTCGACGAGGTGATCATGCACGTGCTGAAGAACAAGTAG**TTCGCGCGCGCGGGGCTAATCT**  
**TCAAACGATGATGGTACACGGTGCAATGGGTTCCAGATTGATCGTACAGTTGCAGTCTACCC**  
**TTCTACATCCTGTAACGCAATGTGGCCTTCTAAAGACCTTATAAACGCGTAAGGTTATAGA**  
**GTATTGCTTTTTTTTTATTATTCAATGAAGATTTATCAATGTTTTTATTAAACACAGTATGCAA**  
**TGTATACAATAAACAAGAAGTGAACCTAACCACAC**

## mod(mdg4)

Mod-RA

**CTAATACGACTCACTATAGGGCAAGCAGTGGTATCAACGCAGAGTACATGGGGGCGAAGTA**  
**ACTGTGCTAGGAGCTGGATGCCGTCGCTCCGCTGTCCGTGTTTGTGAAAACCTATTTTATTCTT**  
**TAGACTTAGTGTTAGTTACACTAAAATTCAGTGTATTGCGTGAATTTAAGCGTCATTGACTG**  
**AGCGGCGGTAAAGCGGAAGCGTCGTCCAAGATGGCGGACGATGAGCAGTTCTCTCTATGTTG**  
**GAACAATTTCAATTCAACTTATCGGCGGGATTTTCATGAATCCCTGCAGCGTGGTGATTTGG**  
**TGGACGTGACGCTGGCTGCTGAAGGTCAGCTAGTTCAGGCACATCGCCTCGTTTTATCAGTA**  
**TGTTCCCCGATTTCCGGAAAATGTTCAACCAAATGCCTAAGAACCAACATGCTTTC**G**TTTT**

CCTGAAAGATGTTACCCACTCGGCGCTCCAGGATCTCATAACAGTTTATGTACTGTGGCGAGG  
TGAATGTGAAGCAAGATGCCCTACCCGCTTTATCAGTACCGCCGAAGCATTGCAAATCAA  
GGATTGACAGAAA**CG**GGCGATAGCGCACCAGCACAACAGTCGCCTGTCAAAGAAGACCCG  
CCGGCGGTCCCTGTGGCGACAGCCAGTATTTCCACCACCGTCCCCGTACTCCCCAACGAAC  
AAAGGTTCAACGTAACCGCATTCAATCGTACAAATTAGAATCGGAAGAGAGTGGCGATGAC  
AAAATAGTGCATTTGCAAGCCAGCACATCTCATCACGTGACGGCCAGCAGCTTCAGGCCCA  
GACAAGCGCTAGCTCTCAGAAACGTGCCATGCCACAGCGTGGCGTTCAGAGTCATGCAAGC  
AAGCGGACGAAAATGTCCATCAGTGCTAGCAGCGACGGATTGGACACATCGGACACGGTAA  
CCACACCGACCCAGGCACAGACCATAACAGACAGTCCAGATAGTGAAGCAACTCCCTGCACA  
AGTGATTGAGCCGGAATACATTGAGCTACCGATGGAATCTGTCAATCCTAAGGCTGAACCAG  
ACTACACGGACGAGGCAGCCGAAATCGAAACGGTTGATGCTGAGACGGAACAGGAACACA  
AGCTATCGGAACATGAGCAAGGCGATGCGGACGATGATGGCAACTACGTTGAGGATGAAAC  
GTACGGAGACATGGGCATGGGCAAGTACGAAGAATCATAACCTAACGGAAGGCGAGGAAGG  
AGCGAAACCTGGCGTATCTGGATTCTGGATTCTGTACACATCGGACGGAGGAACTGGCACG  
GAACAATCGACACAA**G**CGGACGAAAACCTTGCTGTTCCGGTCTGGACAAAAGCGCACC  
ACGCGAACGGCGGTGGTGTGCGGCGGCAAAACACTTGTTCCCTACCA**G**CCACTTTCT  
GTACCGCTCGAACCTGCGCCGGCAGGGCCGCAATGGCGACGTCATCTACTGGGAGT  
GTATCTACAACCGGGGCCAGAAGTGTGCGGACGGCTGAAAACGATAGGCAACAAC  
ATCTACATTTGCAACGGCAA**A**AGTGGAGCACAACCATCCCAACGACCGTAAGCGTAT  
CGTGAATGCGACACTGTGCCGAACCATCATGATGAAGGACATAATGTCTCTGTAA**A**  
**AGGACATCCGCCGACTCTTACAGCAATGTACAACGGTTCGTTTGGGCTCATTTCGAAA**  
**TAAAGCAGTTTTATGTTTTATGAAAAATGAAGCAAAGGCTCTCTTTCTAGTTATAT**  
**CTTTACGGTTTTCCATTTACAAACATCCTTTTTTTTACAAAGTATGATGAATGTTGGT**  
**GAAGCTGTACATCGTTTAAAGTATGGCCCGAGGAATAGGGGAATTTTTACTAAGAAT**  
**AAAAGCAATGGGTATAC**

Mod-RB

**CTAATACGACTCACTATAGGGCAAGCAGTGGTATCAACGCAGAGTACATGGGGGCGAAGTA**  
**ACTGTGCTAGGAGCTGGATGCCGTCGCTCCGCTGTCCGTGTTTGTGAAAACATTTTTATTCTT**  
**TAGACTTAGTGTTTAGTTACACTAAAATTCAGTGTATTGCGTGAATTTAAGCGTCATTGACTG**  
**AGCGGCGGTAAAGCGGAAGCGTTCGTTCAAGATGGCGGACGATGAGCAGTTCCTCTATGTTG**  
**GAACAATTTCAATTTCAACTTATCGGGCGGGATTTATGAATCCCTGCAGCGTGGTGATTTGG**  
**TGGACGTGACGCTGGCTGCTGAAGGTCAGCTAGTTCAGGCACATCGCCTCGTTTTATCAGTA**  
**TGTTCCCGTATTTCCGGAAAATGTTCAACCAAATGCCTAAGAACCAACATGCTTTC**G**TTTT**  
**CCTGAAAGATGTTACCCACTCGGCGCTCCAGGATCTCATAACAGTTTATGTACTGTGGCGAGG**  
**TGAATGTGAAGCAAGATGCCCTACCCGCTTTATCAGTACCGCCGAAGCATTGCAAATCAA**  
**GGATTGACAGAAA**CG**GGCGATAGCGCACCAGCACAACAGTCGCCTGTCAAAGAAGACCCG**  
**CCGGCGGTCCCTGTGGCGACAGCCAGTATTTCCACCACCGTCCCCGTACTCCCCAACGAAC**  
**AAAGGTTCAACGTAACCGCATTCAATCGTACAAATTAGAATCGGAAGAGAGTGGCGATGAC**  
**AAAATAGTGCATTTGCAAGCCAGCACATCTCATCACGTGACGGCCAGCAGCTTCAGGCCCA**  
**GACAAGCGCTAGCTCTCAGAAACGTGCCATGCCACAGCGTGGCGTTCAGAGTCATGCAAGC**  
**AAGCGGACGAAAATGTCCATCAGTGCTAGCAGCGACGGATTGGACACATCGGACACGGTAA**  
**CCACACCGACCCAGGCACAGACCATAACAGACAGTCCAGATAGTGAAGCAACTCCCTGCACA**  
**AGTGATTGAGCCGGAATACATTGAGCTACCGATGGAATCTGTCAATCCTAAGGCTGAACCAG**  
**ACTACACGGACGAGGCAGCCGAAATCGAAACGGTTGATGCTGAGACGGAACAGGAACACA**  
**AGCTATCGGAACATGAGCAAGGCGATGCGGACGATGATGGCAACTACGTTGAGGATGAAAC**  
**GTACGGAGACATGGGCATGGGCAAGTACGAAGAATCATAACCTAACGGAAGGCGAGGAAGG**  
**AGCGAAACCTGGCGTATCTGGATTCTGGATTCTGTACACATCGGACGGAGGAACTGGCACG**



GAACAATCGACACAA**G**CACGGACGAAATATCGCCATGGCAGACAGTTAGCATCACCG  
ACGGCGGTAAAGCGCGATCAGGATGAAGGACCGCGCACCGACAGGATGATGTTTGT  
CCGCAGTTCGTGGGGCCGTAAGCATCTGCTGTACGATGGGTACACGTACGCGTCGAA  
CAAGCGGGTTCGAGTCGACCAACACCACCTACTGGCGCTGCACGTTGTTCCATCGGCG  
AAATGTGCGCGTACCGTGCGGGGTGCGCTGTACGGTGC GCGACGGGCAGATCATCA  
AAATGTACGGCAAGCATAACCATCCGCCGGAAGTGCACAGCTTCGATGGCAAGCAG  
GTCGAAACCGATTACTGTATACATGACCCGTGA**AGAAATAAAGTTTACGAGGGCTTT**  
**TCGGTAAAGGAAGGTGTA**ACTAC

Mod-RC

**CTAATACGACTCACTATAGGGCAAGCAGTGGTATCAACGCAGAGTACATGGGGGCGAAGTA**  
**ACTGTGCTAGGAGCTGGATGCCGTCGCTCCGCTGTCCGTGTTTGTGAAA**ACTATTTTATTCTT  
**TAGACTTAGTGT**TTAGTTACACTAAAATTCAGTGTATTGCGTGAATTTAAGCGT**CATTGACTG**  
**AGCGGCGGTAAAGCGGAAGCGTCC**AAGATGGCGGACGATGAGCAGTTCTCTCTATGTTG  
GAACAATTTCAATTC**CAACT**TATCGGGCGGGATTTCATGAATCCCTGCAGCGTGGTGATTTGG  
TGGACGTGACGCTGGCTGCTGAAGGTCAGCTAGTTCAGGCACATCGCCTCGTTTTATCAGTA  
TGTTCCCCGTATTTCCGGAAAATGTTCAACCAAATGCCTAAGAACCAACATGCTTTC**G**TTTT  
CCTGAAAGATGTTACCCACTCGGCGCTCCAGGATCTCATA**CAG**TTTATGTACTGTGGCGAGG  
TGAATGTGAAGCAAGATGCCCTACCCGCTTTATCAGTACCGCCGAAGCATTGCAAATCAA  
GGATTGACAGAAA**C**GGGCGATAGCGCACCCAGCACAAACAGTCGCCTGTCAAAGAAGACCCG  
CCGGCGGTCCCTGTGGCGACAGCCAGTATTTCCACCACCGTCCCCGTCACTCCCCAACGAAC  
AAAGGTTCAACGTAACCGCATTCAATCGTACAAATTAGAATCGGAAGAGAGTGGCGATGAC  
AAAATAGTGCATTTGCAAGCCAGCACATCTCATCACGTGACGGCCAGCAGCTTCAGGCCCCA  
GACAAGCGCTAGCTCTCAGAAACGTGCCATGCCACAGCGTGGCGTTCAGAGTCATGCAAGC  
AAGCGGACGAAAATGTCCATCAGTGCTAGCAGCGACGGATTGGACACATCGGACACGGTAA  
CCACACCGACCCAGGCACAGACCATA**CAG**ACAGTCCAGATAGTGAAGCAACTCCCTGCACA  
AGTGATTGAGCCGGAATACATTGAGCTACCGATGGAATCTGTCAATCCTAAGGCTGAACCAG  
ACTACACGGACGAGGCAGCCGAAATCGAAACGGTTGATGCTGAGACGGAACAGGAACACA  
AGCTATCGGAACATGAGCAAGGCGATGCGGACGATGATGGCAACTACGTTGAGGATGAAAC  
GTACGGAGACATGGGCATGGGCAAGTACGAAGAATCATA**CCT**AACGGAAGGCGAGGAAGG  
AGCGAAACCTGGCGTATCTGGATTCTGGATTCTGTACACATCGGACGGAGGAACTGGCAG  
GAACAATCGACACAA**G**CTGCTCCGACTTTGGAAACGAACAGCAACGGACCACCACCG  
TCCGGTTGTCTGACCTCACGGACGGCTGGCACTAACGTTGAGCTGAAGTTCATCAAG  
AGCCCCTGGTCCACGCCGTGCCTGGTGTGAACGACTTTCTGTACAATGCGCACAGT  
ACGCGGGGCGAAATTGGCTACTGGCGGTGCCACA**ACT**ACTCGCGCAAGGTAAAGGA  
AGAACGGTGCCGGGCGCGGTGCGTGATCAAGAATGGGCGGCTCAGTGC**GCT**GACCG  
GTGCCAGCACAAATCATCCACCGCACACCGAAAAAATCGAGCGCATCGTGCGCCGC  
AATCTGGCGGACGAGCTACAGGAGCGGAAATGGCACGCAACCAGCAGCACCAGG  
AGGCGGAGGCTCTGCAGTGTTATCAGC**C**AGTGGCCCAACAGTTCCCATAGCCCCA  
**ATAGAATGTGTGGCGCGGGTGGGGTTAGCCAGCAGCAGGAGCAATAATCATTGAAA**  
**ATTTGTGCAATAAAACAATGTGAAACGGTGTGCAATATTGTGGTGCATTCTGACGGG**  
**GAGCACTAGGGCCAA**CACTTGGGCCAA**CACT**GAGCAGTATTTACCTCTGAGCCAAG  
**ATCCTATCTTAAGAATAAAGCTAATCTATTGTTTCGTGTGCGCGCAGGAAGGTTGTG**  
**CCTCATCAGC**

Mod-RD

**CTAATACGACTCACTATAGGGCAAGCAGTGGTATCAACGCAGAGTACATGGGGGCGAAGTA**  
**ACTGTGCTAGGAGCTGGATGCCGTCGCTCCGCTGTCCGTGTTTGTGAAA**ACTATTTTATTCTT

TAGACTTAGTGTTTAGTTACACTAAAATTCAGTGTATTGCGTGAATTTAAGCGTCATTGACTG  
AGCGGCGGTAAGCGGAAGCGTCGTCCAAGATGGCGGACGATGAGCAGTTCTCTCTATGTTG  
GAACAATTTCAATTCCAACTTATCGGGCGGGATTTTCATGAATCCCTGCAGCGTGGTGATTTGG  
TGGACGTGACGCTGGCTGCTGAAGGTCAGCTAGTTCAGGCACATCGCCTCGTTTTATCAGTA  
TGTTCCCCGTATTTCCGGAAAATGTTCAACCAAATGCCTAAGAACCAACATGCTTTC**GT**TTT  
CCTGAAAGATGTTACCCACTCGGCGCTCCAGGATCTCATAACAGTTTATGTAAGTGTGGCGAGG  
TGAATGTGAAGCAAGATGCCCTACCCGCTTTATCAGTACCGCCGAAGCATTGCAAATCAAA  
GGATTGACAGAAA**CG**GGCGATAGCGCACCAGCACAAACAGTCGCCTGTCAAAGAAGACCCG  
CCGGCGGTCCCTGTGGCGACAGCCAGTATTTCCACCACCGTCCCCGTACTCCCCAACGAAC  
AAAGGTTCAACGTAACCGCATTCAATCGTACAAATTAGAATCGGAAGAGAGTGGCGATGAC  
AAAATAGTGCATTTGCAAGCCAGCACATCTCATCACGTGACGGCCAGCAGCTTCAGGCCCA  
GACAAGCGCTAGCTCTCAGAAACGTGCCATGCCACAGCGTGGCGTTCAGAGTCATGCAAGC  
AAGCGGACGAAAATGTCCATCAGTGCTAGCAGCGACGGATTGGACACATCGGACACGGTAA  
CCACACCGACCCAGGCACAGACCATAACAGACAGTCCAGATAGTGAAGCAACTCCCTGCACA  
AGTGATTGAGCCGGAATACATTGAGCTACCGATGGAATCTGTCAATCCTAAGGCTGAACCAG  
ACTACACGGACGAGGCAGCCGAAATCGAAACGGTTGATGCTGAGACGGAACAGGAACACA  
AGCTATCGGAACATGAGCAAGGCGATGCGGACGATGATGGCAACTACGTTGAGGATGAAAC  
GTACGGAGACATGGGCATGGGCAAGTACGAAGAATCATAACCTAACGGAAGGCGAGGAAGG  
AGCGAAACCTGGCGTATCTGGATTCTGGATTCTGTACACATCGGACGGAGGAACTGGCACG  
GAACAATCGACACAA**G**ATTGTTTCAGTGTTCATCCGGTGGCAACGGAATCCAGCGTG  
CAGGGAGGCCACATCTACATACGCAGCCAGCGCGGGTTCGCACTGTTGGCGAAGAA  
TGACTACATCTATCGGTGCGAGCGCGCGCAACCAACGTTCTGTAAGTGGCTGTGCAT  
CCGGTACAAGACGCACCGGTGCAAGGGCCGGCTGATCTGTCTGAAGAACACGGTGC  
TGAAGGAAACCAAGCACTGCCATCCGGACGATCGGCGCCGGCTGGCGATGTCGGAC  
AAGTGCGTGATCGATCTGTCCGGCATCAATATCAACGCGTGGGTTAAGTCCGGTTGGG  
CCACGGAAGCCGGTGCGCCGCGCCAGCGCCAGTGCGCCGGCGGACCTTGTTACAGG  
CTTGTGCTGTTGAT**TGTCAA**AAGGGGGGGCAA**AA**ACAGGAAATGATTAGCGATA**AGA**  
**TTCGTTTGAAGAGC**ATTTTTGCGGGCTATTTGTGAAATA**AA**AAA**ACC**ACTTAATGA  
**CG**

Mod-RE

CTAATACGACTCACTATAGGGCAAGCAGTGGTATCAACGCAGAGTACATGGGGGCGAAGTA  
ACTGTGCTAGGAGCTGGATGCCGTGCTCCGCTGTCCGTGTTTGTGAAA**ACT**ATTTTATTCTT  
TAGACTTAGTGTTTAGTTACACTAAAATTCAGTGTATTGCGTGAATTTAAGCGTCATTGACTG  
AGCGGCGGTAAGCGGAAGCGTCGTCCAAGATGGCGGACGATGAGCAGTTCTCTCTATGTTG  
GAACAATTTCAATTCCAACTTATCGGGCGGGATTTTCATGAATCCCTGCAGCGTGGTGATTTGG  
TGGACGTGACGCTGGCTGCTGAAGGTCAGCTAGTTCAGGCACATCGCCTCGTTTTATCAGTA  
TGTTCCCCGTATTTCCGGAAAATGTTCAACCAAATGCCTAAGAACCAACATGCTTTC**GT**TTT  
CCTGAAAGATGTTACCCACTCGGCGCTCCAGGATCTCATAACAGTTTATGTAAGTGTGGCGAGG  
TGAATGTGAAGCAAGATGCCCTACCCGCTTTATCAGTACCGCCGAAGCATTGCAAATCAAA  
GGATTGACAGAAA**CG**GGCGATAGCGCACCAGCACAAACAGTCGCCTGTCAAAGAAGACCCG  
CCGGCGGTCCCTGTGGCGACAGCCAGTATTTCCACCACCGTCCCCGTACTCCCCAACGAAC  
AAAGGTTCAACGTAACCGCATTCAATCGTACAAATTAGAATCGGAAGAGAGTGGCGATGAC  
AAAATAGTGCATTTGCAAGCCAGCACATCTCATCACGTGACGGCCAGCAGCTTCAGGCCCA  
GACAAGCGCTAGCTCTCAGAAACGTGCCATGCCACAGCGTGGCGTTCAGAGTCATGCAAGC  
AAGCGGACGAAAATGTCCATCAGTGCTAGCAGCGACGGATTGGACACATCGGACACGGTAA  
CCACACCGACCCAGGCACAGACCATAACAGACAGTCCAGATAGTGAAGCAACTCCCTGCACA  
AGTGATTGAGCCGGAATACATTGAGCTACCGATGGAATCTGTCAATCCTAAGGCTGAACCAG  
ACTACACGGACGAGGCAGCCGAAATCGAAACGGTTGATGCTGAGACGGAACAGGAACACA

AGCTATCGGAACATGAGCAAGGCGATGCGGACGATGATGGCAACTACGTTGAGGATGAAAC  
GTACGGAGACATGGGCATGGGCAAGTACGAAGAATCATAACCTAACGGAAGGCGAGGAAGG  
AGCGAAACCTGGCGTATCTGGATTCTGGATTCTGTACACATCGGACGGAGGAACTGGCACG  
GAACAATCGACACAA**GTGGACAAACAGCTGACGAAGCGTAAGGGCACCGAGCTAAT**  
CTCGCTGATCGACAACCAGGATGTAGCGTTCGGCGAAACGGACAACGGTGGCAAGC  
AGCTGACGTACCGCAATTACATCTACCATCGGAACCTAACGACGGGCAGCACCGTG  
TACTGGCGCTGCTCGAAAGCGATGCGCCTCAAGTGTAAGGCGACGATCGTGACCAG  
GGGCGATCTGATGCGTGTCAACAACGTCGAGCACAATCACGTCCCGATGCGCCGAC  
TGACGTACGGATTGGGTGTGAACGAGAAGCGCAAGCTGAAGAAACGCAACGATCCG  
TGGACTCGATGA**GCGCGCAATAAAATTGGTTTAAACCTCTCGCAACAACCGAA**

Mod-RF

**CTAATACGACTCACTATAGGGCAAGCAGTGGTATCAACGCAGAGTACATGGGGGCGAAGTA**  
**ACTGTGCTAGGAGCTGGATGCCGTCGCTCCGCTGTCCGTGTTTGTGAAAACCTATTTTATTCTT**  
**TAGACTTAGTGTTTAGTTACACTAAAATTCAGTGTATTGCGTGAATTTAAGCGTCATTGACTG**  
**AGCGGCGGTAAGCGGAAGCGTTCGTTCAAG**ATGGCGGACGATGAGCAGTTCCTCTATGTTG  
GAACAATTTCAATTCCAACTTATCGGGCGGGATTTTCATGAATCCCTGCAGCGTGGTGATTTGG  
TGGACGTGACGCTGGCTGCTGAAGGTCAGCTAGTTCAGGCACATCGCCTCGTTTTATCAGTA  
TGTTCCCGTATTTCCGGAAAATGTTCAACCAAATGCCTAAGAACCAACATGCTTTC**GTTTT**  
CCTGAAAGATGTTACCCACTCGGCGCTCCAGGATCTCATAACAGTTTATGTACTGTGGCGAGG  
TGAATGTGAAGCAAGATGCCCTACCCGCTTTATCAGTACCGCCGAAGCATTGCAAATCAA  
GGATTGACAGAAA**CGGGCGATAGCGCACCAGCACAAACAGTCGCCTGTCAAAGAAGACCCG**  
CCGGCGGTCCCTGTGGCGACAGCCAGTATTTCCACCACCGTCCCGTCACTCCCAACGAAC  
AAAGGTTCAACGTAACCGCATTCAATCGTACAAATTAGAATCGGAAGAGAGTGGCGATGAC  
AAAATAGTGCATTTGCAAGCCAGCACATCTCATCACGTGACGGCCAGCAGCTTCAGGCCCA  
GACAAGCGCTAGCTCTCAGAAACGTGCCATGCCACAGCGTGGCGTTCAGAGTCATGCAAGC  
AAGCGGACGAAAATGTCCATCAGTGCTAGCAGCGACGGATTGGACACATCGGACACGGTAA  
CCACACCGACCCAGGCACAGACCATAACAGACAGTCCAGATAGTGAAGCAACTCCCTGCACA  
AGTGATTGAGCCGGAATACATTGAGCTACCGATGGAATCTGTCAATCCTAAGGCTGAACCAG  
ACTACACGGACGAGGCAGCCGAAATCGAAACGGTTGATGCTGAGACGGAACAGGAACACA  
AGCTATCGGAACATGAGCAAGGCGATGCGGACGATGATGGCAACTACGTTGAGGATGAAAC  
GTACGGAGACATGGGCATGGGCAAGTACGAAGAATCATAACCTAACGGAAGGCGAGGAAGG  
AGCGAAACCTGGCGTATCTGGATTCTGGATTCTGTACACATCGGACGGAGGAACTGGCACG  
GAACAATCGACACAA**GAACCAGCACGCTACATTGTTGGAGTGCGGGGTAGCCGGAAG**  
CTGAAGGTGGGCGACTATACCTTACCAGGAACAAGGAGTGTTTCGGACAAAACGTA  
CTGGTCCCTGTGCCCAGGCGGGCATGCATCGGTGCAAAGCGCGCGTCCCTCACCTACAA  
CAACAAGAACGGCGAACAGACGTACATACTGCGCAACGGCTTCCACAATCACGAGC  
CGTTCTAG**TGCAGCATTGCTTTGCTTGTGTGTACAATAAAGCTTTTTTCGGTCGGGCGG**  
**GCATGATTGCTTTATGAAAACCAATAAAACGATCTTAAGACACACATTTTACCAC**

Mod-RG

**CTAATACGACTCACTATAGGGCAAGCAGTGGTATCAACGCAGAGTACATGGGGGCGAAGTA**  
**ACTGTGCTAGGAGCTGGATGCCGTCGCTCCGCTGTCCGTGTTTGTGAAAACCTATTTTATTCTT**  
**TAGACTTAGTGTTTAGTTACACTAAAATTCAGTGTATTGCGTGAATTTAAGCGTCATTGACTG**  
**AGCGGCGGTAAGCGGAAGCGTTCGTTCAAG**ATGGCGGACGATGAGCAGTTCCTCTATGTTG  
GAACAATTTCAATTCCAACTTATCGGGCGGGATTTTCATGAATCCCTGCAGCGTGGTGATTTGG  
TGGACGTGACGCTGGCTGCTGAAGGTCAGCTAGTTCAGGCACATCGCCTCGTTTTATCAGTA  
TGTTCCCGTATTTCCGGAAAATGTTCAACCAAATGCCTAAGAACCAACATGCTTTC**GTTTT**

CCTGAAAGATGTTACCCACTCGGCGCTCCAGGATCTCATAACAGTTTATGTACTGTGGCGAGG  
TGAATGTGAAGCAAGATGCCCTACCCGCTTTATCAGTACCGCCGAAGCATTGCAAATCAA  
GGATTGACAGAAA**CG**GGCGATAGCGCACCAGCACAAACAGTCGCCTGTCAAAGAAGACCCG  
CCGGCGGTCCCTGTGGCGACAGCCAGTATTTCCACCACCGTCCCCGTACTCCCCAACGAAC  
AAAGGTTCAACGTAACCGCATTCAATCGTACAAATTAGAATCGGAAGAGAGTGGCGATGAC  
AAAATAGTGCATTTGCAAGCCAGCACATCTCATCACGTGACGGCCAGCAGCTTCAGGCCCA  
GACAAGCGCTAGCTCTCAGAAACGTGCCATGCCACAGCGTGGCGTTCAGAGTCATGCAAGC  
AAGCGGACGAAAATGTCCATCAGTGCTAGCAGCGACGGATTGGACACATCGGACACGGTAA  
CCACACCGACCCAGGCACAGACCATAACAGACAGTCCAGATAGTGAAGCAACTCCCTGCACA  
AGTGATTGAGCCGGAATACATTGAGCTACCGATGGAATCTGTCAATCCTAAGGCTGAACCAG  
ACTACACGGACGAGGCAGCCGAAATCGAAACGGTTGATGCTGAGACGGAACAGGAACACA  
AGCTATCGGAACATGAGCAAGGCGATGCGGACGATGATGGCAACTACGTTGAGGATGAAAC  
GTACGGAGACATGGGCATGGGCAAGTACGAAGAATCATACTAACGGAAGGCGAGGAAGG  
AGCGAAACCTGGCGTATCTGGATTCTGGATTCTGTACACATCGGACGGAGGAACTGGCACG  
GAACAATCGACACAA**GGT**GGTGTACATAGTCGGGCAGCGTGGCAGCATACTGCTCTC  
GGTGAATGGGCATCGTTACGTGAAGAACCGCAAGGGCCACACGAAAACCTACTGGA  
TTTGCGCGAAAA**AG**CGTTGGATGCCGGGCGCGCCTTACAACGACCGTGTCCGAAAA  
CGATCACCGCACAAAGCGCCGAAGCACCGAAAATCATTCTCATGTCCGGCATTACACA  
ATCACGCCAGCCGACCAACTTCCGGCGCGTTAATGAGGGCAGGCAACCGACCACC  
GTACCACAGCCGATTCGAGCCGGGCGGGATACGGCCGCGGAAGGGAGGGCGTCCA  
ATCAGCAGCCCCCATACTGTCCACCACACCACCGCAGCGGATGCTGA**TGAAGGCG**  
**AGAATGATTTCCCTGCAGTTGTCCTGTGGCAGAGAAGACGGGGGCGCGGAAAGAGTG**  
**AATCACCTGCCCTGCTGAAATGTCTTCTTTCCCTGGAGAAAGGCACCCTGGCAGCC**  
**ATGGCAGCCGGAAGAGGTGTTGTTTGCTTAATAAGGCCAATAAAATGTAATAGG**  
**GCGCGCTCGTGCGTGCGTGCTATACTGAACC**

Mod-RH

**CTAATACGACTCACTATAGGGCAAGCAGTGGTATCAACGCAGAGTACATGGGGGCGAAGTA**  
**ACTGTGCTAGGAGCTGGATGCCGTCGCTCCGCTGTCCGTGTTTGTGAAAACCTATTTTATTCTT**  
**TAGACTTAGTGTTAGTTACACTAAAATTCAGTGTATTGCGTGAATTTAAGCGTCATTGACTG**  
**AGCGGCGGTAAGCGGAAGCGTCGTCCAAGATGGCGGACGATGAGCAGTTCTCTCTATGTTG**  
**GAACAATTTCAATTCCAATTATCGGGCGGGATTTTCATGAATCCCTGCAGCGTGGTGATTTGG**  
**TGGACGTGACGCTGGCTGCTGAAGGTCAGCTAGTTCAGGCACATCGCCTCGTTTTATCAGTA**  
**TGTTCCCCGTATTTCCGGAATAATGTTCAACCAAATGCCTAAGAACCAACATGCTTTC**G**TTTT**  
**CCTGAAAGATGTTACCCACTCGGCGCTCCAGGATCTCATAACAGTTTATGTACTGTGGCGAGG**  
**TGAATGTGAAGCAAGATGCCCTACCCGCTTTATCAGTACCGCCGAAGCATTGCAAATCAA**  
**GGATTGACAGAAA**CG**GGCGATAGCGCACCAGCACAAACAGTCGCCTGTCAAAGAAGACCCG**  
**CCGGCGGTCCCTGTGGCGACAGCCAGTATTTCCACCACCGTCCCCGTACTCCCCAACGAAC**  
**AAAGGTTCAACGTAACCGCATTCAATCGTACAAATTAGAATCGGAAGAGAGTGGCGATGAC**  
**AAAATAGTGCATTTGCAAGCCAGCACATCTCATCACGTGACGGCCAGCAGCTTCAGGCCCA**  
**GACAAGCGCTAGCTCTCAGAAACGTGCCATGCCACAGCGTGGCGTTCAGAGTCATGCAAGC**  
**AAGCGGACGAAAATGTCCATCAGTGCTAGCAGCGACGGATTGGACACATCGGACACGGTAA**  
**CCACACCGACCCAGGCACAGACCATAACAGACAGTCCAGATAGTGAAGCAACTCCCTGCACA**  
**AGTGATTGAGCCGGAATACATTGAGCTACCGATGGAATCTGTCAATCCTAAGGCTGAACCAG**  
**ACTACACGGACGAGGCAGCCGAAATCGAAACGGTTGATGCTGAGACGGAACAGGAACACA**  
**AGCTATCGGAACATGAGCAAGGCGATGCGGACGATGATGGCAACTACGTTGAGGATGAAAC**  
**GTACGGAGACATGGGCATGGGCAAGTACGAAGAATCATACTAACGGAAGGCGAGGAAGG**  
**AGCGAAACCTGGCGTATCTGGATTCTGGATTCTGTACACATCGGACGGAGGAACTGGCACG**

GAACAATCGACACAA**G**ATCGCGCGCGGGCAACTAAACCAACGGTGCTGAACGGCAA  
GCAAAACTCCGGTGCCGTTGTGACGACGTCGGTGAAGCAGCCGCGCATTCCGAAAC  
ACGTAAAGTCACCCAAAATGAAGCGCACCATCCGATCCCAGGGGGGAGAGGAGGA  
GGAGGAGCAGGAACCGTCGACACTTGCATTCCGTGTGCGCAACACGCCGGTCGCGG  
TGGACGAGACCAAGATCCAATACTACTACCGGGCGCGGTAACAACGTGCTCGTGTAC  
GACGGCCATCGGTACATCAAGAACAACCTGCTACGGTGGGAAGGTGTACTGGAAGTG  
CAGCAAGTGGCACACGATGTGCATGGCGCGCGCAATAACCTCGATCCTGCATCCGA  
ACCAGTGCCTGCTGAAGAACTCGCACACCACGGCCCGCTGAAGGAAGACATCACG  
CTGGATGTGCCGACGACTGGCGATAG**ATTTTCGTTAACCGAGCTAAAAGGACAAAA**  
**CCGCTGGCCCTTTTTTGTGCTTCTTTGCTTGTCTTTGCTTTATACACAAACCGATCC**  
**GGTGGCCGAGGCGATAGCGTCGCCGGTCTTCGCTCGGCAGGAAGGGCCGGGATTCA**  
**AATCCGATCCAGACCCCGTCTCCCGGTACGCAGGGCTCTGACTACTTTACTACGGG**  
**TAAATTAAGTCACAGAAAGCCAGAAATGGCTGGCAGGCCGGAGACTTCTCGAGGT**  
**TGTGTAGTGCCAAGGAAGAAGAAGAAGAAGATCACTCTGTAATGATTATTGGC**  
**GTGTAGGTTAAGTGTGAGAGGAGGGGTATGGTCAAATTCCGACCTACAATAAATCC**  
**TACATACAGGCT**

Mod-RI

**CTAATACGACTCACTATAGGGCAAGCAGTGGTATCAACGCAGAGTACATGGGGGCGAAGTA**  
**ACTGTGCTAGGAGCTGGATGCCGTCGCTCCGCTGTCCGTGTTTGTGAAAACCTATTTTATTCTT**  
**TAGACTTAGTGTTTAGTTACACTAAAATTCAGTGTATTGCGTGAATTTAAGCGTCATTGACTG**  
**AGCGGCGGTAAAGCGGAAGCGTCGTCCAAGATGGCGGACGATGAGCAGTTCTCTCTATGTTG**  
**GAACAATTTCAATTCAACTTATCGGCGGGATTTTCATGAATCCCTGCAGCGTGGTGATTTGG**  
**TGGACGTGACGCTGGCTGCTGAAGGTCAGCTAGTTCAGGCACATCGCCTCGTTTTATCAGTA**  
**TGTTCCCGTATTTCCGGAATAATGTTCAACCAAATGCCTAAGAACCAACATGCTTTC**G**TTTT**  
**CCTGAAAGATGTTACCCACTCGGCGCTCCAGGATCTCATAACAGTTTATGTACTGTGGCGAGG**  
**TGAATGTGAAGCAAGATGCCCTACCCGCTTTATCAGTACCGCCGAAGCATTGCAAATCAAA**  
**GGATTGACAGAAA**C**GGGCGATAGCGCACCCAGCACAAACAGTCGCCTGTCAAAGAAGACCCG**  
**CCGGCGGTCCCTGTGGCGACAGCCAGTATTTCCACCACCGTCCCCGTCCTCCCAACGAAC**  
**AAAGGTTCAACGTAACCGCATTCAATCGTACAAATTAGAATCGGAAGAGAGTGGCGATGAC**  
**AAAATAGTGCATTTGCAAGCCAGCACATCTCATCACGTGACGGCCAGCAGCTTCAGGCCCCA**  
**GACAAGCGCTAGCTCTCAGAAACGTGCCATGCCACAGCGTGGCGTTCAGAGTCATGCAAGC**  
**AAGCGGACGAAAATGTCCATCAGTGCTAGCAGCGACGGATTGGACACATCGGACACGGTAA**  
**CCACACCGACCCAGGCACAGACCATAACAGACAGTCCAGATAGTGAAGCAACTCCCTGCACA**  
**AGTGATTGAGCCGGAATACATTGAGCTACCGATGGAATCTGTCAATCCTAAGGCTGAACCAG**  
**ACTACACGGACGAGGCAGCCGAAATCGAAACGGTTGATGCTGAGACGGAACAGGAACACA**  
**AGCTATCGGAACATGAGCAAGGCGATGCGGACGATGATGGCAACTACGTTGAGGATGAAAC**  
**GTACGGAGACATGGGCATGGGCAAGTACGAAGAATCATACTAACGGAAGGCGAGGAAGG**  
**AGCGAAACCTGGCGTATCTGGATTCGTGGATTCGTACACATCGGACGGAGGAACTGGCACG**  
**GAACAATCGACACAA**G**AAGTGATTAAGCAGGACGCCACCGCCTCCACAACGATCTGC**  
**TTCCGGAAGAGCCAAAAGGGCAAGCTGCAGCTATCGCACGACGGGTACTACTACTG**  
**TATGGAGAAACGGATACAGCGCAAAGAGTACTGGCGCTGCATTTACTACACGACGA**  
**AGATCAAGTGCCACGGGCGGCTGCACCGGGACGACAGCAAGGTGCGCTACATGGGC**  
**GCACACAACCACGCGCCCAAGCTGTTCAAACGGGCCGACTACAAACGGCTGTCCGA**  
**GATTGTAGGGCTGTCCGCCGAGGACCAACCAACGACCGGCAAGACGCACACTTGAA**  
**CACCAGCTGAACAAGGATTACTTTCTGAGAGAGAGATAGAGTATAAAGCGAAACAA**  
**TAAAGCGTTACACAATAAACGATCATGCCGAACGTCCACATC**

Mod-RJ

CTAATACGACTCACTATAGGGCAAGCAGTGGTATCAACGCAGAGTACATGGGGGCGAAGTA  
ACTGTGCTAGGAGCTGGATGCCGTCGCTCCGCTGTCCGTGTTTGTGAAAACATTTTTATTCTT  
TAGACTTAGTGTTTAGTTACACTAAAATTCAGTGTATTGCGTGAATTTAAGCGTCATTGACTG  
AGCGGCGGTAAGCGGAAGCGTTCGAAGATGGCGGACGATGAGCAGTTCTCTCTATGTTG  
GAACAATTTCAATTCCAACTTATCGGGCGGGATTTTCATGAATCCCTGCAGCGTGGTGATTTGG  
TGGACGTGACGCTGGCTGCTGAAGGTCAGCTAGTTCAGGCACATCGCCTCGTTTTATCAGTA  
TGTTCCCCGTATTTCCGGAAAATGTTCAACCAAATGCCTAAGAACCAACATGCTTTC**GT**TTT  
CCTGAAAGATGTTACCCACTCGGCGCTCCAGGATCTCATAACAGTTTATGTACTGTGGCGAGG  
TGAATGTGAAGCAAGATGCCCTACCCGCTTTATCAGTACCGCCGAAGCATTGCAAATCAAA  
GGATTGACAGAAA**CG**GGCGATAGCGCACCAGCACAAACAGTCGCCTGTCAAAGAAGACCCG  
CCGGCGGTCCCTGTGGCGACAGCCAGTATTTCCACCACCGTCCCCGTCACTCCCCAACGAAC  
AAAGGTTCAACGTAACCGCATTCAATCGTACAAATTAGAATCGGAAGAGAGTGGCGATGAC  
AAAATAGTGCATTTGCAAGCCAGCACATCTCATCACGTGACGGCCAGCAGCTTCAGGCCCA  
GACAAGCGCTAGCTCTCAGAAACGTGCCATGCCACAGCGTGGCGTTCAGAGTCATGCAAGC  
AAGCGGACGAAAATGTCCATCAGTGCTAGCAGCGACGGATTGGACACATCGGACACGGTAA  
CCACACCGACCCAGGCACAGACCATAACAGACAGTCCAGATAGTGAAGCAACTCCCTGCACA  
AGTGATTGAGCCGGAATACATTGAGCTACCGATGGAATCTGTCAATCCTAAGGCTGAACCAG  
ACTACACGGACGAGGCAGCCGAAATCGAAACGGTTGATGCTGAGACGGAACAGGAACACA  
AGCTATCGGAACATGAGCAAGGCGATGCGGACGATGATGGCAACTACGTTGAGGATGAAAC  
GTACGGAGACATGGGCATGGGCAAGTACGAAGAATCATAACCTAACGGAAGGCGAGGAAGG  
AGCGAAACCTGGCGTATCTGGATTCTGGATTCTGTACACATCGGACGGAGGAACTGGCACG  
GAACAATCGACACAA**GC**CGCCATTCTCACCGCAACGCCTGAACCGCACTCGTCGTCG  
TGGATCGCGGTGGAAAAGTCCGTGCTGCAGTACGCGACAACGCAGCGCGGCCGAAC  
GATGCTCATCTTCAGCGGCTACAAGTTTGTGGAAAATCGGCAGAGCAAGCGGAACA  
TCTTCTGGCGCTGCGCCCGCTACGTGAAGCACGGTTGCCGGGCCGCTTGCGTGACGT  
CGAAAAATGGTGCCGGCACCCAATCGATACGGTTGACCGGGCTGGCCCATAGCCAC  
CCGCCGGAAGATGGACGAACCACGGACAGGGCGAGCGATCAACCGTCCACCACCAC  
CACCACCACCATGGTGTTCGGTTCGTTGGACAGTAG**ATCGAGCAATAATGGTAGGAAA**  
**GGGCGAGCCAACGTGCGTGTGAGTGCATTTATTTTCCGCAGCCGATTTTCAGCGCTT**  
**TTTTTAAAATAAATAATTCAAAGTACG**

Mod-RK

CTAATACGACTCACTATAGGGCAAGCAGTGGTATCAACGCAGAGTACATGGGGGCGAAGTA  
ACTGTGCTAGGAGCTGGATGCCGTCGCTCCGCTGTCCGTGTTTGTGAAAACATTTTTATTCTT  
TAGACTTAGTGTTTAGTTACACTAAAATTCAGTGTATTGCGTGAATTTAAGCGTCATTGACTG  
AGCGGCGGTAAGCGGAAGCGTTCGAAGATGGCGGACGATGAGCAGTTCTCTCTATGTTG  
GAACAATTTCAATTCCAACTTATCGGGCGGGATTTTCATGAATCCCTGCAGCGTGGTGATTTGG  
TGGACGTGACGCTGGCTGCTGAAGGTCAGCTAGTTCAGGCACATCGCCTCGTTTTATCAGTA  
TGTTCCCCGTATTTCCGGAAAATGTTCAACCAAATGCCTAAGAACCAACATGCTTTC**GT**TTT  
CCTGAAAGATGTTACCCACTCGGCGCTCCAGGATCTCATAACAGTTTATGTACTGTGGCGAGG  
TGAATGTGAAGCAAGATGCCCTACCCGCTTTATCAGTACCGCCGAAGCATTGCAAATCAAA  
GGATTGACAGAAA**CG**GGCGATAGCGCACCAGCACAAACAGTCGCCTGTCAAAGAAGACCCG  
CCGGCGGTCCCTGTGGCGACAGCCAGTATTTCCACCACCGTCCCCGTCACTCCCCAACGAAC  
AAAGGTTCAACGTAACCGCATTCAATCGTACAAATTAGAATCGGAAGAGAGTGGCGATGAC  
AAAATAGTGCATTTGCAAGCCAGCACATCTCATCACGTGACGGCCAGCAGCTTCAGGCCCA  
GACAAGCGCTAGCTCTCAGAAACGTGCCATGCCACAGCGTGGCGTTCAGAGTCATGCAAGC  
AAGCGGACGAAAATGTCCATCAGTGCTAGCAGCGACGGATTGGACACATCGGACACGGTAA  
CCACACCGACCCAGGCACAGACCATAACAGACAGTCCAGATAGTGAAGCAACTCCCTGCACA

AGTGATTGAGCCGGAATACATTGAGCTACCGATGGAATCTGTCAATCCTAAGGCTGAACCAG  
ACTACACGGACGAGGCAGCCGAAATCGAAACGGTTGATGCTGAGACGGAACAGGAACACA  
AGCTATCGGAACATGAGCAAGGCGATGCGGACGATGATGGCAACTACGTTGAGGATGAAAC  
GTACGGAGACATGGGCATGGGCAAGTACGAAGAATCATACTAACGGAAGGCGAGGAAGG  
AGCGAAACCTGGCGTATCTGGATTCTGGATTCTGTACACATCGGACGGAGGAACTGGCACG  
GAACAATCGACACAA**GT**ACGAGCAGGATTCCCGCTTGCTGACGCCCGAGTTTTGTGT  
CACCCAGCGCGGTCATCCATTGCTAGTGCACGGCGGCTACAGCTTCACGCGCAATGG  
CGAGTTTTCCGACACGATCAACTGGCGCTGCTCGATGTACCGGAAAAGGAAGTGCA  
AGGCCAAAGCGATCACCGTTAA**AACCGATGGGCAGGATTCGGTGAAGCTGACCCAC**  
**GCGATACACAACCATCCCCCGGGCTTCCACGGCAGAAACACATCAAACACTGCTG**  
**GACCGAAATGCTCACACTGGCACCGACGACGACGACGACGCGGACGGCAACGACG**  
**GGACCGCTCGCACAGCTGGACGATGCATTCGGCGACATTATGGGACTGGCGGATGA**  
**ACATGACTTTTTCATCACCATAAGGACGAATCGCTCCACATGGATTGCATTGAAGA**  
**TTCCTGTAAGGTGGTTGTCGCAGAGATGAAAGAGATTAAAGATTCAAACCTGTGA**  
**ACG**

Mod-RL

**CTAATACGACTCACTATAGGGCAAGCAGTGGTATCAACGCAGAGTACATGGGGGCGAAGTA**  
**ACTGTGCTAGGAGCTGGATGCCGTCGCTCCGCTGTCCGTGTTTGTGAAAACACTATTTTATTCTT**  
**TAGACTTAGTGTTTAGTTACACTAAAATTCAGTGTATTGCGTGAATTTAAGCGTCATTGACTG**  
**AGCGGCGGTAAGCGGAAGCGTCTCCAAGATGGCGGACGATGAGCAGTTCTCTCTATGTTG**  
**GAACAATTTCAATTCAACTTATCGGCGGGATTTTCATGAATCCCTGCAGCGTGGTGATTTGG**  
**TGGACGTGACGCTGGCTGCTGAAGGTCAGCTAGTTCAGGCACATCGCCTCGTTTTATCAGTA**  
**TGTTCCCCGTATTTCCGGAATAATGTTCAACCAAATGCCTAAGAACCAACATGCTTTC**GT**TTT**  
**CCTGAAAGATGTTACCCACTCGGCGCTCCAGGATCTCATAAGTTTATGTACTGTGGCGAGG**  
**TGAATGTGAAGCAAGATGCCCTACCCGCTTTATCAGTACCGCCGAAGCATTGCAAATCAA**  
**GGATTGACAGAAA**CG**GGCGATAGCGCACCCAGCACAAACAGTCGCCTGTCAAAGAAGACCCG**  
**CCGGCGGTCCCTGTGGCGACAGCCAGTATTTCCACCACCGTCCCCGTCCTCCCAACGAAC**  
**AAAGGTTCAACGTAACCGCATTCAATCGTACAAATTAGAATCGGAAGAGAGTGGCGATGAC**  
**AAAATAGTGCATTTGCAAGCCAGCACATCTCATCACGTGACGGCCAGCAGCTTCAGGCCCA**  
**GACAAGCGCTAGCTCTCAGAAACGTGCCATGCCACAGCGTGGCGTTCAGAGTCATGCAAGC**  
**AAGCGGACGAAAATGTCCATCAGTGCTAGCAGCGACGGATTGGACACATCGGACACGGTAA**  
**CCACACCGACCCAGGCACAGACCATAACAGACAGTCCAGATAGTGAAGCAACTCCCTGCACA**  
**AGTGATTGAGCCGGAATACATTGAGCTACCGATGGAATCTGTCAATCCTAAGGCTGAACCAG**  
**ACTACACGGACGAGGCAGCCGAAATCGAAACGGTTGATGCTGAGACGGAACAGGAACACA**  
**AGCTATCGGAACATGAGCAAGGCGATGCGGACGATGATGGCAACTACGTTGAGGATGAAAC**  
**GTACGGAGACATGGGCATGGGCAAGTACGAAGAATCATACTAACGGAAGGCGAGGAAGG**  
**AGCGAAACCTGGCGTATCTGGATTCTGGATTCTGTACACATCGGACGGAGGAACTGGCACG**  
**GAACAATCGACACAA**G**ATCCCGAAGCACCCACGCAACATGGTGCTGAACGTTAAGGCC**  
**GAAGGGATGAAACAGCAGCCGCCAAAATCGGGCACCGCCACCAGCCTGGGCCTGA**  
**AGAAGGTGTACAAAACCGATGACGATGGGGAAACGATCGATGTGGAGCACAAAGTTT**  
**GCACTCGATTTGCGGCTCGAGACGGGTTGCAAGGGCCCGCCGAAGCTCATCATGGG**  
**GGGGTACGCGTTTTTCCGCAACAACAGCAGCAACAACAAGACCTACTGGCTGTGTTC**  
**CAAGAGTCGGCTGCTGAAGTGTGCGGCCGCATCATCACCTTGGACGGGTGCTCGG**  
**GGATGATACTCAAGAATCAGCTCCACAATCATCCACCCACCGAGCTATAA**TACGAC****  
**GGGCCGGCGGTGGCTCTGTTGCTATACTTTTGTTTTTTGAATTCCCTCTTAACGAACT**  
**CTGTTTTGTAGTTTATATCTCGCAGGGGGCCATATATTGAAAAGTATTTTTCGTCGC**

CCAGTTTATGCAATACAGTGAATTATGTTTAGTAATAGTATGATCATCATCGGTTTCA  
GAAATAAAAGCGTACGTACTACTGCAATCAC

Mod-RM

CTAATACGACTCACTATAGGGCAAGCAGTGGTATCAACGCAGAGTACATGGGGGCGAAGTA  
ACTGTGCTAGGAGCTGGATGCCGTCGCTCCGCTGTCCGTGTTTGTGAAAACATTTTTATTCTT  
TAGACTTAGTGTTTAGTTACACTAAAATTCAGTGTATTGCGTGAATTTAAGCGTCATTGACTG  
AGCGGCGGTAAGCGGAAGCGTCCGCAAGATGGCGGACGATGAGCAGTTCTCTCTATGTTG  
GAACAATTTCAATTCCAACTTATCGGGCGGGATTTTCATGAATCCCTGCAGCGTGGTGATTTGG  
TGGACGTGACGCTGGCTGCTGAAGGTCAGCTAGTTCAGGCACATCGCCTCGTTTTATCAGTA  
TGTTCCCCGTATTTCCGGAAAATGTTCAACCAAATGCCTAAGAACCAACATGCTTTCGTTTTT  
CCTGAAAGATGTTACCCACTCGGCGCTCCAGGATCTCATAACAGTTTATGTACTGTGGCGAGG  
TGAATGTGAAGCAAGATGCCCTACCCGCTTTATCAGTACCGCCGAAGCATTGCAAATCAA  
GGATTGACAGAAAAGCGGCGATAGCGCACCAGCACAAACAGTCGCCTGTCAAAGAAGACCCG  
CCGGCGGTCCCTGTGGCGACAGCCAGTATTTCCACCACCGTCCCCGTCCTCCCAACGAAC  
AAAGGTTCAACGTAACCGCATTCAATCGTACAAATTAGAATCGGAAGAGAGTGGCGATGAC  
AAAATAGTGCATTTGCAAGCCAGCACATCTCATCACGTGACGGCCAGCAGCTTCAGGCCCA  
GACAAGCGCTAGCTCTCAGAAACGTGCCATGCCACAGCGTGGCGTTCAGAGTCATGCAAGC  
AAGCGGACGAAAATGTCCATCAGTGCTAGCAGCGACGGATTGGACACATCGGACACGGTAA  
CCACACCGACCCAGGCACAGACCATAACAGACAGTCCAGATAGTGAAGCAACTCCCTGCACA  
AGTGATTGAGCCGGAATACATTGAGCTACCGATGGAATCTGTCAATCCTAAGGCTGAACCAG  
ACTACACGGACGAGGCAGCCGAAATCGAAACGGTTGATGCTGAGACGGAACAGGAACACA  
AGCTATCGGAACATGAGCAAGGCGATGCGGACGATGATGGCAACTACGTTGAGGATGAAAC  
GTACGGAGACATGGGCATGGGCAAGTACGAAGAATCATAACCTAACGGAAGGCGAGGAAGG  
AGCGAAACCTGGCGTATCTGGATTCTGGATTCTGTACACATCGGACGGAGGAACTGGCACG  
GAACAATCGACACAAAGGTGTTGATGTGTCCAGATCCATTACGCTATACCGTTCCCGGC  
TTACGTTTCATACGAGGACAGCGCGATCACAAGCTGCTGGTGGTTGGCGGGTACACCT  
ACGCACGGAACAATTCTGCCAAGAACACCCCATCTACTGGGCTGCCGCACGTCGT  
ACGCTAGCGTGCGGTGTAATTCGCGCGTCTGTGACTACGCACATGGCAGGACGGCACG  
TACCGCATCGTGATCACCAACCCACGGCACAACCATCCGCGTCCGGTTCGCACTGAC  
GAACGAATATTTGCACAGCTTAAGCCTGCTGAACCGTCCATTCAATCGGAAGTGAAC  
GGTTGTGGTAGGTGAATGACGCCGAACACTACTCGCGAGAACGTAGCTTAAACTGGGT  
CAGCTTTCGGAAACGGAAAAAGAGAATAAAC

Mod-RN

CTAATACGACTCACTATAGGGCAAGCAGTGGTATCAACGCAGAGTACATGGGGGCGAAGTA  
ACTGTGCTAGGAGCTGGATGCCGTCGCTCCGCTGTCCGTGTTTGTGAAAACATTTTTATTCTT  
TAGACTTAGTGTTTAGTTACACTAAAATTCAGTGTATTGCGTGAATTTAAGCGTCATTGACTG  
AGCGGCGGTAAGCGGAAGCGTCCGCAAGATGGCGGACGATGAGCAGTTCTCTCTATGTTG  
GAACAATTTCAATTCCAACTTATCGGGCGGGATTTTCATGAATCCCTGCAGCGTGGTGATTTGG  
TGGACGTGACGCTGGCTGCTGAAGGTCAGCTAGTTCAGGCACATCGCCTCGTTTTATCAGTA  
TGTTCCCCGTATTTCCGGAAAATGTTCAACCAAATGCCTAAGAACCAACATGCTTTCGTTTTT  
CCTGAAAGATGTTACCCACTCGGCGCTCCAGGATCTCATAACAGTTTATGTACTGTGGCGAGG  
TGAATGTGAAGCAAGATGCCCTACCCGCTTTATCAGTACCGCCGAAGCATTGCAAATCAA  
GGATTGACAGAAAAGCGGCGATAGCGCACCAGCACAAACAGTCGCCTGTCAAAGAAGACCCG  
CCGGCGGTCCCTGTGGCGACAGCCAGTATTTCCACCACCGTCCCCGTCCTCCCAACGAAC  
AAAGGTTCAACGTAACCGCATTCAATCGTACAAATTAGAATCGGAAGAGAGTGGCGATGAC  
AAAATAGTGCATTTGCAAGCCAGCACATCTCATCACGTGACGGCCAGCAGCTTCAGGCCCA  
GACAAGCGCTAGCTCTCAGAAACGTGCCATGCCACAGCGTGGCGTTCAGAGTCATGCAAGC



AAGCGGACGAAAATGTCCATCAGTGCTAGCAGCGACGGATTGGACACATCGGACACGGTAA  
CCACACCGACCCAGGCACAGACCATAACAGACAGTCCAGATAGTGAAGCAACTCCCTGCACA  
AGTGATTGAGCCGGAATACATTGAGCTACCGATGGAATCTGTCAATCCTAAGGCTGAACCAG  
ACTACACGGACGAGGCAGCCGAAATCGAAACGGTTGATGCTGAGACGGAACAGGAACACA  
AGCTATCGGAACATGAGCAAGGCGATGCGGACGATGATGGCAACTACGTTGAGGATGAAAC  
GTACGGAGACATGGGCATGGGCAAGTACGAAGAATCATACTAACGGAAGGCGAGGAAGG  
AGCGAAACCTGGCGTATCTGGATTCTGGATTCTGTACACATCGGACGGAGGAACTGGCACG  
GAACAATCGACACAA**G**

Mod-RO

CTAATACGACTCACTATAGGGCAAGCAGTGGTATCAACGCAGAGTACATGGGGGCGAAGTA  
ACTGTGCTAGGAGCTGGATGCCGTCGCTCCGCTGTCCGTGTTTGTGAAAACCTATTTTATTCTT  
TAGACTTAGTGTTTAGTTACACTAAAATTCAGTGTATTGCGTGAATTTAAGCGTCATTGACTG  
AGCGGCGGTAAGCGGAAGCGTTCGAAGATGGCGGACGATGAGCAGTTCTCTCTATGTTG  
GAACAATTTCAATTCCAACCTTATCGGCGGGATTTTCATGAATCCCTGCAGCGTGGTGATTGG  
TGGACGTGACGCTGGCTGCTGAAGGTCAGCTAGTTCAGGCACATCGCCTCGTTTTATCAGTA  
TGTTCCCCGTATTTCCGGAAAATGTTCAACCAAATGCCTAAGAACCAACATGCTTTC**GT**TTT  
CCTGAAAGATGTTACCCACTCGGCGCTCCAGGATCTCATAACAGTTTATGTACTGTGGCGAGG  
TGAATGTGAAGCAAGATGCCCTACCCGCTTTATCAGTACCGCCGAAGCATTGCAAATCAA  
GGATTGACAGAAA**CG**GGCGATAGCGCACCAGCACAAACAGTCGCCTGTCAAAGAAGACCCG  
CCGGCGGTCCCTGTGGCGACAGCCAGTATTTCCACCACCGTCCCCGTCCTCCCAACGAAC  
AAAGGTTCAACGTAACCGCATTCAATCGTACAAATTAGAATCGGAAGAGAGTGGCGATGAC  
AAAATAGTGCATTTGCAAGCCAGCACATCTCATCACGTGACGGCCAGCAGCTTCAGGCCCA  
GACAAGCGCTAGCTCTCAGAAACGTGCCATGCCACAGCGTGGCGTTCAGAGTCATGCAAGC  
AAGCGGACGAAAATGTCCATCAGTGCTAGCAGCGACGGATTGGACACATCGGACACGGTAA  
CCACACCGACCCAGGCACAGACCATAACAGACAGTCCAGATAGTGAAGCAACTCCCTGCACA  
AGTGATTGAGCCGGAATACATTGAGCTACCGATGGAATCTGTCAATCCTAAGGCTGAACCAG  
ACTACACGGACGAGGCAGCCGAAATCGAAACGGTTGATGCTGAGACGGAACAGGAACACA  
AGCTATCGGAACATGAGCAAGGCGATGCGGACGATGATGGCAACTACGTTGAGGATGAAAC  
GTACGGAGACATGGGCATGGGCAAGTACGAAGAATCATACTAACGGAAGGCGAGGAAGG  
AGCGAAACCTGGCGTATCTGGATTCTGGATTCTGTACACATCGGACGGAGGAACTGGCACG  
GAACAATCGACACAA**G**

Mod-RP

CTAATACGACTCACTATAGGGCAAGCAGTGGTATCAACGCAGAGTACATGGGGGCGAAGTA  
ACTGTGCTAGGAGCTGGATGCCGTCGCTCCGCTGTCCGTGTTTGTGAAAACCTATTTTATTCTT  
TAGACTTAGTGTTTAGTTACACTAAAATTCAGTGTATTGCGTGAATTTAAGCGTCATTGACTG  
AGCGGCGGTAAGCGGAAGCGTTCGAAGATGGCGGACGATGAGCAGTTCTCTCTATGTTG  
GAACAATTTCAATTCCAACCTTATCGGCGGGATTTTCATGAATCCCTGCAGCGTGGTGATTGG  
TGGACGTGACGCTGGCTGCTGAAGGTCAGCTAGTTCAGGCACATCGCCTCGTTTTATCAGTA  
TGTTCCCCGTATTTCCGGAAAATGTTCAACCAAATGCCTAAGAACCAACATGCTTTC**GT**TTT  
CCTGAAAGATGTTACCCACTCGGCGCTCCAGGATCTCATAACAGTTTATGTACTGTGGCGAGG  
TGAATGTGAAGCAAGATGCCCTACCCGCTTTATCAGTACCGCCGAAGCATTGCAAATCAA  
GGATTGACAGAAA**CG**GGCGATAGCGCACCAGCACAAACAGTCGCCTGTCAAAGAAGACCCG  
CCGGCGGTCCCTGTGGCGACAGCCAGTATTTCCACCACCGTCCCCGTCCTCCCAACGAAC  
AAAGGTTCAACGTAACCGCATTCAATCGTACAAATTAGAATCGGAAGAGAGTGGCGATGAC  
AAAATAGTGCATTTGCAAGCCAGCACATCTCATCACGTGACGGCCAGCAGCTTCAGGCCCA  
GACAAGCGCTAGCTCTCAGAAACGTGCCATGCCACAGCGTGGCGTTCAGAGTCATGCAAGC  
AAGCGGACGAAAATGTCCATCAGTGCTAGCAGCGACGGATTGGACACATCGGACACGGTAA

CCACACCGACCCAGGCACAGACCATAACAGACAGTCCAGATAGTGAAGCAACTCCCTGCACA  
AGTGATTGAGCCGGAATACATTGAGCTACCGATGGAATCTGTCAATCCTAAGGCTGAACCAG  
ACTACACGGACGAGGCAGCCGAAATCGAAACGGTTGATGCTGAGACGGAACAGGAACACA  
AGCTATCGGAACATGAGCAAGGCGATGCGGACGATGATGGCAACTACGTTGAGGATGAAAC  
GTACGGAGACATGGGCATGGGCAAGTACGAAGAATCATACTAACGGAAGGCGAGGAAGG  
AGCGAAACCTGGCGTATCTGGATTCTGTGGATTCTGTACACATCGGACGGAGGAACTGGCAG  
GAACAATCGACACAA**G**

## CP190

NCCATGCTTTCCNNTAAGCAGTGNNATCAACGNNCAGAGTACATGGGAAACAGCAAATTC  
GTTCGTTTTTAAGTCAACTTTTGTGCGAGTTCTCGAAACAAAGCACAGTTTTGATTTGGTGAA  
GTGCTGGCAGAGNTGAAAAAGCAGTTAAAAAGGACGCGCAGTGAGCACAGTGCATGTGA  
ATGATGTAATTA**AAAG**ATGACGCGTTACGCGGAGGCCAAGTCGGTGAAGGTGGACA**ACTGG**  
GGTGTGTTTTTCTGCAGAAGCTGCAAACTTCTTCAACAAAACCGACCACTGCGATCTGAC  
GCTACAGTTCAACGACA**ACTCGCAGCTGAAGGTGCACCGGCTAGTGCTGTCCGCCTGTACGG**  
ACTACTTTAACCATCTGGAAAACGTGTGCGAGATGTACGACGACG**ACTGATCATGCCGATG**  
GATCTGCAGGCCGACGTGATAGTGCCGATTGTGA**ACTTTATGTACACCGGCACGCTCGAGTT**  
CCAGTACAATATGTACGACCGGCTGCTGAAAACGGCCACCGACATGAACATGACCGTGCTG  
CTGAAGCTGCTCGAGGCCATCGGCAAACGT**CGTCGCGAATTGTGAAGCAACCGGTGCTGT**  
GAACAAGCAAGCGCCACGTCTCGCGGTGCTCCAGTGTACCAAGGCGCTGGGCCGCGCGTT  
ATGCCCGCACAGAGAGGCGCGAACGTGGGACCGAGACCGCGATTACCGGTGGCACGCCAAC  
CGATGCATATGTACGGCCACAAAGGGGCCGGT**CACAGCACAGCAAAGGACGTCAAGCCAGG**  
TCCTTCGCGGTT**CGATGACGGCGAAATGGGCGAAGGTTTCGAGGGATCGTTCGATGGCATT**  
ACGTACGAAACCA**AACTGCTAACAGCCGACCAGGTGAAAAAGGAAGAAGAGACATCT**  
CCGTT**CGAAAAGCTGCGCAAAGGCTACACCAACGCAAACGTGGTGAAGCGATCGTCCAGC**  
GGTTCGCTCACATCTCCGCCGGCCAAGAAGCCGAACCTGGATGAAGTGAAGAATT**CACC**  
GAAGCGGCCCGCATGCGAAGCCAGCTAGCGACGGCGAATGATGATGATTCGCCCGACTAC  
GTGGATGACGATA**CCCACTTTAACGACGACGATGATGAGGATTATCAGCCACCGGCTTCG**  
GTAAAAGCCGCTTTGGCAAAGTCCGCCAGT**CACCACGCGGGAACGGTCAAGCACGGTACC**  
ATCAAGCAGGAATCGAAATC**ACCCGGCTCGGGTGGCAATTCGAGCGCGATGAAACAGATC**  
ACGGTAAAGGACGATTCCGGCAGCGT**CGATCATGCGAAGATCATATCGGAGGTGCTGAAG**  
AAATACCCCATCTGGTGAAGAAGAA**CAAAAACATCAAGCTAAAGATCATGCAGAAACCG**  
TCGCCGAACAATGCGAACGCAACCAACGCCAGCAGCGCCTCGTCCAGTGCGGTAGCGACA  
CCGAAGATGGAAAGTGCGTACCGCAACGC**CTTTAAAGCAGGACCTCTCGATGGTGCGCCGC**  
GCGACCGCAAACATACGCAGCGAAACAGCGAAACCGTCAGCCGGGTCCGCGACGTCCACC  
GGTAAACCGACCACCGGCACAACCAAAACGATCGACGCGAAAACGATGCACGCGCTGATC  
GCGAAGGGTGC**GAAAACACCACCGGCCCTTGGTTGTGTTTGCGGTGCGGCATCAACGGC**  
CGTCCGATCAGCATTCCGAGCTACAAAGCGT**CTACAACCATTTGATCCACAAGCACAAAG**  
GAGCGCATCGATGTGCGCATCTGCGAGCACTGCGGGTTCAAGGCGCAGCAGCGCAATCCG  
CACCTGATCTACCACTGGTTCACCGAGCACAAGGTGAAGCCCACGATCAAGTTCCCGCGG  
TGCGACGAGTGC**GATCACGTGCAATGACGGCGGACGATTTGCAGAAGCACGAGGAGGAG**  
GCGCATTCCCGGGGCGACCTGCAGCAGTGCATCTACTGCAACAAGGTGTTTGCGAAGGAG  
ATGGAGCTGTACGATCACATGAAGGAGCAGCACAAGGCGCGTGCTATCGCGGACGGTGTG  
CTGGAGTTTACGGACGATGAAGACTACCAATCGCAGGAGGAGGAAGTATCGTCCCCCAG  
GGGGGCAAACGTA**CTCCGCCAAAGGGGCTAGCGGAGAAGGTAAGATCAAATCTTGTCC**  
AACATTACGCTGCCTCCGGCGAAGGGATCGAGCTCGGCGGCGGCTGGTGGTTCGGTGC**GT**  
CACATCACGCTCGAACCATCGTCCGAAGCGGAAGCACTGAGCAATGTGGCGTCCGGC**ATC**  
GCCACCAGTCTGACGCTTGT**CGGTGACAATGGGGTCGTGATCGACGACCCCAACTACCAG**  
AATCAGTTCATCGAAGCGGAGCTGGCGAGCGTGCATGGGGAGAATGCGAGCACGGGCAGC

GAAACAACCATCCCGAAGCTGGTGACTGCCGATGGGACCGAGCTGCAGCTGACTCAATCG  
CAGAAGGATGAAATAATTTCTCAGCTACAAAACACTGGCGGT**GG**CAACGACGTGGTGATG  
GTGTTGAACGAGGACAACCTTTTCGGTCGGATCCACGATACAGCTGGACGAGGGGGTGCAG  
ATCGTAGACACGTCCTCGCAAAACATTATGGTAATGTACAGCCAGCCGGAGGGTGGCGAA  
TCGGAACATAACGATAGCCAAAAGTCCGACGCGAAGGTGGCCGCCGCCGATGTGACGACG  
GCATCGGAAGACGACAATTCGCAAGCATCCGTCTCGCTGTCCGAGGACAAGGCAGCATCG  
TCGATCGCGGACAAGCAACCGTCGCTTGAGGGTGGCGATGAGAGCCAGGAATCGCGCCGT  
ACGGACGCGTCCGACAAGCCGGAAGCCGAAGACGAAGGCAACACCACCATGGACGATGAC  
GTGGACATGTCCGGTGGCGATGTAACGTCGGAAACGAACGAAACGCTGCAGCAAGCCGTC  
AAGGACGAGCTGATGGATCTGGAGGACGAGTTGCGGGCCCCGACACGTCGGCCGACGGA  
ACGAAGGAGGACGAGCTGAACGATTCGGAAGATCGGCAGCAATCGGACAAGCTGAAGCTG  
ATTTCCGAGCTGGAAGGCGATTGGTTCGGAGGATACGGCGGAAGAACAACCCGGCACACCG  
GCTGTCGCGGACGTTTCGGAGAAGGCTGCCACGAAAAAGGTGACAGCAACGGCAACGGTT  
GATAAGAAAGCAACCGCATCAACTCCTGCCGCCAAAACAGCGTCAAAGCCGACCGGCGGA  
GAGAAAAAGCCCGTAGCGGAAGCGGTGGCGACAGGGAAGAAGAGGCCTCTGGGTGAAGCG  
CCAGCAGCAGCAGCAGCAGCACCCCTTCCAAGGAGCGTAAAAAGTCAGGAGGCGAGGAG  
AACTTTCCGAAAAGGAAATCGATAAGCTGCTCGATGATTGGAACAACGAGGCAAAGCTG  
GACGAGCTCACAGAGGAAGCGGATCTCGAGAAGGAAATAGCAAAAGTGACCGGTGTGAAG  
GCTGCTGAGACCGGCGAGAGTGATAGTAAAAAGCCGAACGAGGTGAAAAAGGACACTGCG  
GCTGCGGATGCGACGAAACACGACAAACCGGACACAACGGACGCGGACGCGGACAAGCCA  
ACGGTGGAGGAAGAGGAGCAGGAGGAGGATGTGGAGGAAGAGGAAACGGTTACACCTGCG  
GAAGAAGGAAAGGAAAGCGTCTCGGTGAAAGGGAAGAAAAATGGTACAGCCTCCGCCACT  
GAGACCAGCCGGAGCAAGCTGGAGGACACCAGTGAACCTGGACGAAGAGCAGGAAGAGGAC  
GACGATGATGGCGACGAAGAGGATAAGGACAAAGCGAACGCTAAGTCGAAGGAGGTTAGC  
TCACTGTTGGGCGAGTGGGATGAGGACGATGATCTGTGA**AGGGATCAAAGTTGACCACACA**  
**TGTAGTAGCTTACAAAGTTTTACATTTACATTACGTAGTCAGTTTTTACACCTGCCCGGGTCC**  
**GTAGGAAANGGTCGCCAAGCCNNGGGCGTGAGANTTTTGANAGTTGACCACAGAGGGATT**  
**AACGTTAAGATACGTTGTACGCAAACGATTCGCTTTTGAGTAAACCTGCGGTAAGGTAGTT**  
**ATAAAGGTAATAAGCTATTATAAAGGTAATAAGCTANNTAACNNGGCTACATCCTATATCGA**  
**AAGGTTNTGA**

## Figure S2 Amino Acid alignments

### SU (HW)

|       |     |                                                                                        |     |
|-------|-----|----------------------------------------------------------------------------------------|-----|
| DROSO | 1   | MSASKEGKEKKGKLLGVENISPPKDKRPATRMKLLNDVGAGEDSEASTTTTTTSRTPSNKQEKRGSVAGSRIKILNEEILG      | 80  |
| STEPH | 1   | MVGS-----RRSVVG-----                                                                   | 11  |
| DROSO | 81  | TPKTEKRGATKSTAPAASTVKILNEKKTSPSATVTAVETTKIKTSPSKRKKMEHYVLQAVKSENTKADTTVTVVTEEDDTI      | 160 |
| STEPH | 12  | -----VRSGGVKKEEILVNVQVNGN--                                                            | 31  |
| DROSO | 161 | DFILADDEEVVPGRIENNGQEI VVTEDEDEDLGEDGEDGEDSSGKGNSS----QTKIKEIV-----EHVCGKCYKTFRR       | 231 |
| STEPH | 32  | -----DEIDLVPVNSADYGRG---SSDDR DGE EEEEEYEDLSDNPDSDPDLLETEDGRLILDMKR SKYCGRCKKIFKT      | 103 |
| DROSO | 232 | VQSLKKHLEFCRYDSGYHLRKADMLKNLEKIEKDAVMEK-----KDICFCCSESYDTFHLGHINCPDCPKSFKTQ            | 302 |
| STEPH | 104 | SAEQKAHKYKC---PGVVDEVQDVILKERKAAKHANPGEEFHKYCNPNPNPCYCCGEDVSTAHVGHIRCKFCPKSFKAY        | 180 |
| DROSO | 303 | TSYERHIFITHSEFSDFPSCICNANLRSEALLALHEEQHKSRGKPYACKICGKDFTRSYHLKRHQYSSCS--SNETDTM        | 380 |
| STEPH | 181 | EYMERHLSSIHSESDAFPCYCNACSTQEILDEHLKTH-DEGKPYACMACGKDFTRRYHLDRHEKHTKCGIVPKEVEVL         | 259 |
| DROSO | 381 | SCKVCDRVFYRLDNLRSHLQHLGTQVVKKPEYMCHTCKNCFYSLSTLNIHIRTHTGKPFDCDLCDKKFSALVALKKHR         | 460 |
| STEPH | 260 | PCEVCGKEFTRIDNLRREHLRSHMG-QGARKRDYQCPYCSKSFYGSLLNIHIRTHTGKPFPCDLCPMSFPSTGALRKHR        | 338 |
| DROSO | 461 | RYHTGKPYSCCTVCNQAFAVKEVLNRHMKRHTGERPHKCECGKSFIQATQLRTHSKTHI--RFPCEQCDEKFKTEKQL         | 538 |
| STEPH | 339 | RKHTGERPYRCDECSATFAARETLNRHRKTHHTGKPHVCQECGKRFIQATQLRSHMLNHSGD SAFQCSECDATFNRKARL      | 418 |
| DROSO | 539 | ERHVKTHSRTKRPVFS CAECKRNF-RTPALLKEHMDEGKHS PKQ-----QRSSMRS AVKIMERT-----DCAICDKNF      | 605 |
| STEPH | 419 | TEHIKFTHKGEQP-FECEKCSKTLRKDDLARHELIHSDVKPYECLVCRKFFTTKNAILLHQRT HLEENPVQCKVCSGTF       | 497 |
| DROSO | 606 | DSSDTLRRHIRTVHECDPDDIFG-VEPHPSKR---AKKDIESEEVVPVALNTSAGSLISSQTD-----GNGVVVRE           | 672 |
| STEPH | 498 | KRSDCLMRHMRTKHRDFLDKIIDDTEKEKMEKLT TTKRETEKEAVVEI---DGAIYQITTMDDAPAKGTAYTGNNQTVEV      | 574 |
| DROSO | 673 | FLVDE-----GDGAAQTITLENETYTILPLDGAIEGEQLTDEAGVKPEAKKEEAQVSPVVKKEQ-----                  | 731 |
| STEPH | 575 | FEVV ELPASASDAIPNTLPTTSVPYELVPV--VDDTEVILGDSSPVEFVGKANTPIDVVVKKEEDSFKKVKSPPKATVVS      | 652 |
| DROSO | 732 | -----RKS LAAS-----LAAA IADNLEESCSE-----                                                | 753 |
| STEPH | 653 | KSSEP VAPKVVGKASEGEP SRKSV PSTSKTTATIKPKTEHVVA VRASNEPPQKTPPKLAKE IAREKEEPSTKLAKK PATL | 732 |
| DROSO | 754 | -----DDFSGEILTEEDIK LKENVGLIDMLVDPPI LKKYGWPNAPEETVL                                   | 799 |

|       |     |                                                    |          |                        |                    |       |                                  |     |
|-------|-----|----------------------------------------------------|----------|------------------------|--------------------|-------|----------------------------------|-----|
| STEPH | 733 | PTARPKEAKSRAVEEAKLKRKREPKPATPKRMRP                 | DEDSIP   | I                      | FLSDDM             | -     | LEQKISELLQMLMGEDMLRSFGWPNAPVEVVL | 811 |
| DROSO | 800 | CKVIENCGHDLTKGGENYAELDYGSRMREYCKLLFTVVIHNS         | IKSLLNFP | IDDVIEYVL              | GEDQDEGGLDKDNESHSG |       |                                  | 879 |
| STEPH | 812 | GRVIQCGHQPAKGEAG                                   | ---      | DHTTRMRENTKILFSVTMDDDD | IKALLNNHTVDEVIMHVL | ----- |                                  | 869 |
| DROSO | 880 | DEEAVSVTGETKTNEIREKPEKKEVSAKSEKKEIVGKAVDKDNSEEVVRE | ENK      | KKPVGEQEKA             |                    |       | 941                              |     |
| STEPH | 870 | -----                                              | ---      | KNK                    | -----              |       | 872                              |     |

**MOD (mdg4)**

|       |     |                                           |                  |            |              |                |                        |        |     |
|-------|-----|-------------------------------------------|------------------|------------|--------------|----------------|------------------------|--------|-----|
| DROSO | 1   | MADDEQFSLCWNFNFTNLSAGFHESLCRGDLVDVSLAAEQ  | IVKAHRLVLSVCS    | PF         | FRKMFTQMP    | SNT            | HAIVFLNNVSHS           | 80     |     |
| STEPH | 1   | MADDEQFSLCWNFNFSNLSAGFHESLQRGDLVDVTLAAEQ  | LVQAHRPVL        | SVCS       | PF           | FRKMFNQMP      | KNQHAFVFLKDVTHS        | 80     |     |
| DROSO | 81  | ALKDLIQFMYCGEVNVKQDALPAFISTAESLQIKGLTDND  | ---              | PAPQPPQESS | PP           | --             | PAAPHVQQQQIPA--QRVQRQP | 153    |     |
| STEPH | 81  | ALQDLIQFMYCGEVNVKQDALPAFISTAEEALQIKGLTETG | DSAPAQQSP        | VKED       | PP           | AVPV           | ATASISTTVPVTPQRTKVQRN  | 160    |     |
| DROSO | 154 | RASARYKIETVDDGLGDEKQSTTQIVIQTTAAPQAT      | IVQQQQPQQA       | AQQIQSQQL  | QTGTTTTAT    | TLVSTN         | KRSAQRSSLTP            | 233    |     |
| STEPH | 161 | RIQS-YKLESEESG--DDKI----                  | VHLQASASHVT      | -----      | AQQLQAQ      | -----          | TSASSQKRAMPQRGVQS      | 213    |     |
| DROSO | 234 | ASSSAGVKRSKTSTSANVMDPLDSTTETGATTTAQ       | LVPQQITV         | QTSVVSAAE  | AKLHQQSP     | QVRQE          | EAEYIDLPE-LPT          | 312    |     |
| STEPH | 214 | HAS----KRTKMSISAS-SDGLDTSDTVTTPTQAQ       | -----            | TIQT       | -----        | VQIVKQLPAQVI   | --EPEYIELPMEVSNP       | 273    |     |
| DROSO | 313 | KSEPDYSED-----                            | HGDAAGDAEGTYVEDD | TYGDM--    | RYDDSYFTENED | DAGNQTAAN      | -----TSG               | 365    |     |
| STEPH | 274 | KAEPDYTDEAAEIE TVDAETE QEHKLS             | HEHQDADDDGNYVEDE | TYGDMGMGK  | YEESYLTEGE   | EGAKPGVSGFVDSY | TSD                    | 353    |     |
| DROSO | 366 | GGVTATTSKAVVKQQSQNYSESSFVDTS              | SGDQGNTEAQD      | GPSKDTA--- | IPKPAEHPRK   | PVTDSV--       | QKSPRDADAIPLFD         | 440    |     |
| STEPH | 354 | GG-TGT-----EQSTQD-----                    | RGSLRSTGVDDVP    | FSNST      | RMDDLKTIKKEV | DPIDKDV        | LLEQLPFPLRSINPNE       | 417    |     |
| DROSO | 441 | GSRVFSKVALAKAYIPPMIYTCRVM                 | LVIGKDKLVRIA     | QHEET      | TDKDLIQDI    | IITHVCKVF      | ALRGNQLTP---SAVQEF     | 517    |     |
| STEPH | 418 | ASTSETNYTNADATHKYLRLVATR                  | KSMRGSVSGK       | KGETIVC    | QERPK----    | LAADDRSTMSK    | FHELKKSNGSPAHR         | SRCVSC | 493 |
| DROSO | 518 | IDHKLSTLKLMP                              | IK               | EGK        | -----        |                |                        | 534    |     |
| STEPH | 494 | FNRTVLESERMP                              | KPKTK            | KWVTTFCGDC | PGKPF        | L              | CILCFSRIHCNNRIGIGEV    | 545    |     |

**CP190**

|       |     |       |       |        |       |       |       |       |        |        |        |         |       |       |       |       |       |       |       |       |      |       |     |     |      |   |     |
|-------|-----|-------|-------|--------|-------|-------|-------|-------|--------|--------|--------|---------|-------|-------|-------|-------|-------|-------|-------|-------|------|-------|-----|-----|------|---|-----|
| DROSO | 1   | M---  | GEVKS | VKVDN  | WGVFF | LQKLQ | NFFNK | TDYCD | LTLLQ  | FRDNS  | QLKVH  | RLVLS   | ACTDY | FNVL  | EQTC  | EIVDD | ALIMP | NEFQ  | 77    |       |      |       |     |     |      |   |     |
| STEPH | 1   | MTRY  | AEAKS | VKVDN  | WGVFF | LQKLQ | NFFNK | TDHCD | LTLLQ  | FDNSQ  | LKVHRL | VLSACT  | DYFNH | LENV  | CEMYD | DLIMP | MDLQ  |       | 80    |       |      |       |     |     |      |   |     |
| DROSO | 78  | ADV   | VVPI  | VNFMY  | TGTFE | LKMYG | KLLRT | AKEMN | MTVLL  | KLLEA  | HRRTM  | ENVNR   | Q---- | QRPP  | SPKG  | IIRRT | TVGQ  | PSSG  | 152   |       |      |       |     |     |      |   |     |
| STEPH | 81  | ADV   | VVPI  | VNFMY  | TGTFE | QYNMY | DRLLK | TATDM | MNTVLL | KLLEA  | HRQTSS | RIVKQ   | PVLLN | KQAP  | PRPR  | GAPVY | QGAG  | PRV-  | 159   |       |      |       |     |     |      |   |     |
| DROSO | 153 | LP    | QQRV  | LGPSP  | QSRNV | ATPIA | QRANT | QRGST | G---   | NTMS   | RTSG   | GSNR    | SPYGD | SSN-  | ----- | VKQ   |       |       | 207   |       |      |       |     |     |      |   |     |
| STEPH | 160 | MP    | AQRG  | ANVGP  | PRPR  | ---   | LPV   | ARQP  | MHMYG  | HKGAG  | HSTAK  | DVKPG   | PSRF  | DDGEM | GEGF  | EGSFD | GITYE | TKPLL | TADQ  | VKKE  | 236  |       |     |     |      |   |     |
| DROSO | 208 | EPT   | SPFE  | QLRKG  | YNNN  | ---   | KRPA  | QTSLL | SPPSK  | KPSLE  | EVKE   | FAEQ    | QRMK  | QIAA  | EYGD  | NDPEY | DGGML | YDDV  | HAGD  | DDDD  | 284  |       |     |     |      |   |     |
| STEPH | 237 | EET   | SPFE  | KLRKG  | YTNAV | VVKR  | SSSG  | SLTSP | PAKK   | PNLDE  | VKEFT  | EAARM   | SQLAT | ANDD  | SDPY  | ----  | VDDT  | THFN  | DDDD  |       | 312  |       |     |     |      |   |     |
| DROSO | 285 | DD    | MPPQ  | PSTSK  | QQSP  | QGTQT | Q--   | LEHG  | STTI   | ILKQ   | DSP-   | -----   | SQT   | PTI   | IVKD  | SSNA  | KLNHT | KIIAE | VLRQ  | YPHI  | VKGH | 356   |     |     |      |   |     |
| STEPH | 313 | ED    | YQPP  | ASVKA  | ALAKS | ASHHA | GT    | VKHG  | --     | TIK    | ESKSP  | GSGG    | NSAM  | KQIT  | VKDD  | SGS-  | VDHA  | KIIE  | SEVL  | KKYP  | HLV  | VKKN  | 389 |     |      |   |     |
| DROSO | 357 | KNI   | KLKIM | PNTPA  | APTE  | KSA   | PATV  | KPPAN | QSSAT  | TSPHK  | KLHVS  | FKAD    | KSTPL | I---  | TAQQ  | KAAS  | SQQKS | GTSQT | TGNQ  |       |      | 433   |     |     |      |   |     |
| STEPH | 390 | KNI   | KLKIM | QK---- | PSP   | NNAN  | ATN   | ASSAS | ---    | SSAV   | ATPK   | MEVRT   | ATPL  | KQDL  | SMVRR | ATAN  | IRSET | AKPS  | AGSAT | STG   | KPT  | 464   |     |     |      |   |     |
| DROSO | 434 | TG    | ANPP  | PANT   | AAAQ  | KRRID | SKTM  | HALIA | QGAEN  | TG     | PWLCL  | RCGV    | NGRPI | SIPSY | RGRH  | LINT  | HKET  | IDPAL | CEHC  | GWR   |      | 513   |     |     |      |   |     |
| STEPH | 465 | TG    | TT-   | -----  | KTID  | AKTM  | HALIA | KGAEN | TG     | PWLCL  | RCGI   | NGRPI   | SIPSY | KAFY  | NHLI  | HKH   | KERID | VRI   | CEHC  | GFK   |      | 534   |     |     |      |   |     |
| DROSO | 514 | SV    | N-    | NREL   | HFM   | YMEH  | QTKS  | LLYT  | FAE    | CALCN  | QSYRT  | KGEL    | EAHIN | EVHT  | DDNK  | QQCI  | YCNK  | VFEQ  | ELQL  | LYRH  | MKS  | YHKE  | 592 |     |      |   |     |
| STEPH | 535 | AQ    | QRN   | PHLI   | YHWF  | TEHK  | VKPT  | I-K   | FPR    | CDECD  | HVAM   | TADDL   | QKHEE | EAHS  | RGDL  | QQCI  | YCNK  | VFAK  | EMELY | DHM   | KEQ  | HKA   | 613 |     |      |   |     |
| DROSO | 593 | QA    | LEDG  | IIDE   | TDEE  | FLGS  | QDEE  | EEEA  | -EG    | DEE--- | QEPE   | QTGK    | VRIL  | SDIS  | L     | PATSA | ----- | ITV   | QQAQ  | ----- |      | 651   |     |     |      |   |     |
| STEPH | 614 | RA    | IADG  | VLEF   | TDEE  | YQSQ  | EEV   | SSP   | QGGK   | TYSAQ  | QASG   | EGKIK   | ILSN  | ITL   | PPAK  | GSSS  | AAAG  | GSVR  | HITL  | EPS   | SEAE | AL    | 693 |     |      |   |     |
| DROSO | 652 | ----- | ----- | -----  | ----- | QEQL  | QEED  | VEV   | QQE    | -----  | VKF    | VGAD    | GNEV  | LTDE  | QRKE  | ILSQL | NQQQ  |       |       |       |      | 695   |     |     |      |   |     |
| STEPH | 694 | SN    | VASG  | IATSL  | TLVGD | NGVVI | DDPNY | QNFIE | AE     | LASV   | HGEN   | ASTGT   | ETTIP | KLVT  | ADGT  | ELQL  | TQSQ  | KDEI  | ISQL  | QN--  |      | 771   |     |     |      |   |     |
| DROSO | 696 | AG    | ATAG  | G--    | VVM   | V     | LSEP  | ----- | EAE    | HVKQ   | ETDE   | KSLA    | ----- | GTE   | EYDD  | SQIY  | SELGA | ADSV  | ESAK  | NI    | ADE  | 756   |     |     |      |   |     |
| STEPH | 772 | ---   | TGG   | NDV    | VM    | V     | LNE   | DNF   | SVG    | STIQ   | LDEG   | VQIV    | DTSS  | QNIM  | V     | MSQ   | PEGGE | SEH   | NSQ   | KSDA  | KVA  | AAAD  | VTT | ASE | DDNS | Q | 848 |
| DROSO | 757 | SK    | ESID  | NLEW   | AENL  | IAESE | EQSN  | KEPK  | SDKPR  | DDI    | SEK    | LKEL    | TGDW  | TE    | DN--- | DDD   | VDDK  | PATA  | E     | ELASE | LANK | DPEPT | 832 |     |      |   |     |
| STEPH | 849 | AS    | VSL   | SEDKA  | AASSI | ADKQ  | PSLE  | GGDES | QESR   | RTD    | ASDK   | PE----- | AEDE  | GN    | TTM   | DDVD  | --    | MSG   | GDVT  | SE-   | TNET | LQQA  | 919 |     |      |   |     |

|       |      |                                                                                   |      |
|-------|------|-----------------------------------------------------------------------------------|------|
| DROSO | 833  | VHEEEDDIDLALQSLHKGPEEATEEKASEESVTSADDAVDAVPNINSQ-----PEKMDVDSEAA-----             | 891  |
| STEPH | 920  | VKDELMDLEDELRAPDTSADGKTEDELNDSedrQQSDKLKLISELEGDWSEDTAEEQPGTPAVADVSEKAAATKKVTATAT | 999  |
| DROSO | 892  | -DEKASKAEVQIKKEAELENDQEEFIKEDSPIPHSDSVAELREAVTA-----SEGEDDVHLEADNIRKELLDELIA      | 961  |
| STEPH | 1000 | VDKKATASTPAAKTASKPTGGEKPPVAEAVATGKKRPLGEAPAAAAAAPPSSKERKKSGGEEK--LSEKEIDK-LLDDWNN | 1076 |
| DROSO | 962  | EAEKPDQEKDIVQSEENATTEALDRSVTDEDDLVPPTQVSTEQMEIDEPAAEKAENNEDTRTADEKEAVEDKPNQTQDV   | 1041 |
| STEPH | 1077 | EAKLDELTEEADLEKEIAKVTGVKAAETGESDSKKPNEVKK-----DTAAADATKHDKPDTTDADADKPTVEEEEQEEDV  | 1151 |
| DROSO | 1042 | TTAEKPTLESAKAGDEATS-----GEAASVDKVKSLISEWGDDDEDEDENG-----VSAAAKE-----              | 1094 |
| STEPH | 1152 | E--EEETVTPAEEGKESVSVKGKKNGTASATETSRSKLEDTSELDEEQEEDDDGDEEDKDKANAKSKEVSSLLGEWDED   | 1229 |
| DROSO | 1095 | -EL                                                                               | 1096 |
| STEPH | 1230 | DDL                                                                               | 1232 |
